# Supplementary material for: Radioresistance Mechanisms in Prostate Cancer Cell Lines Surviving Ultra-Hypo-Fractionated EBRT: Implications and Possible Clinical Applications
Source: MDPI journal article supplement (doi:10.3390/cancers14225504), 2022-11-09
Supplement: s1 [file s1]

**Table S1: List of primers used for gene expression analysis**

| <b>Target gene</b> | <b>Forward primer</b>         | <b>Reverse primer</b>         |
|--------------------|-------------------------------|-------------------------------|
| Nanog              | 5'-TACCTCAGCCTCCAGCAGA -3'    | 5'-TTTTTGC GACACTCTTCTCTGC-3' |
| Sox2               | 5'-CACCCCTGGCATGGCTCTT-3'     | 5'-GAGCTGGCCTCGGACTTGA-3'     |
| $\beta$ -Actin     | 5'-TGCACCACACCTTCTACAATG-3'   | 5'-CAGCCTGGATAGCAACGTACAT-3'  |
| IL-6               | 5'-ATGAACTCCTTCTCCACAAGC-3'   | 5'-GTTTTCTGCCAGTGCCTCTTTG-3'  |
| CAT                | 5'-TCCTGAGAGAGTTGTGCATG-3'    | 5'-CTGCGATGGGAGTCTTCTTT-3'    |
| CSTK               | 5'-CCCGCAGTAATGACACCCTT-3'    | 5'-TCGGGGATCTCTCTGTACCC-3'    |
| GAPDH              | 5'-GGAATTTGGTCGTATTGGG-3'     | 5'-GGAAGATGGTGATGGGATT-3'     |
| GPX4               | 5'-ATCGACGGGCACATGGTTA-3'     | 5'-ATCCGCAAACCACACTCAG-3'     |
| NRF2               | 5'-GCAACAGGACATTGAGCAAGT-3'   | 5'-ACTTCTGTCAGTTTGGCTTCTG-3'  |
| OPG                | 5'-TGGAATAGATGTTACCCTGTGTG-3' | 5'-GCTGCTCGAAGGTGAGGTTA-3'    |
| RUNX2              | 5'-TTACTTACACCCCGCCAGTC-3'    | 5'-TATGGAGTGCTGCTGGTCTG-3'    |
| SOD2               | 5'-GTGAACAACCTGAACGTCAC-3'    | 5'-ATGACCACCACCATTGAACT-3'    |
| EZH2               | 5'-TGTAATAATCAGAGTACATGCGA-3' | 5'-TGACGATTGGAATAAACAT-3'     |
