# Supplementary material for: Radioresistance Mechanisms in Prostate Cancer Cell Lines Surviving Ultra-Hypo-Fractionated EBRT: Implications and Possible Clinical Applications
Source: MDPI journal article supplement (doi:10.3390/cancers14225504), 2022-11-09
Supplement: s1 [file s1]

**Table S2**

Percentages of necrotic and early/late apoptotic PC3 and PC3RR cells treated with Docetaxel for 24h and 48h.

| <b>24h</b>   | <b>Docetaxel</b> | <b>Necrotic (%)</b> | <b>Early/late apoptotic (%)</b> |
|--------------|------------------|---------------------|---------------------------------|
| <b>PC3</b>   | Ctr              | 3.29 ± 0.63         | 1.91 ± 0.48                     |
|              | 10 nM            | 5.74 ± 2.38         | 2.37 ± 0.93                     |
|              | 20 nM            | 3.95 ± 1.2          | 2.31 ± 1.07                     |
|              | 50 nM            | 4.31 ± 1.09         | 2.75 ± 1.06                     |
|              | 100 nM           | 3.88± 0.96          | 2.54 ± 0.85                     |
| <b>PC3RR</b> | Ctr              | 5.79 ± 0.37         | 2.80 ± 1.35                     |
|              | 10 nM            | 5.82 ± 0.63         | 4.05 ± 0.70                     |
|              | 20 nM            | 7.03 ± 0.88         | 5.31 ± 0.94                     |
|              | 50 nM            | 10.1 ± 1.44         | 2.11± 0.23                      |
|              | 100 nM           | 11.1 ± 1.44         | 2.47 ±0.42                      |

| <b>48h</b>   | <b>Docetaxel</b> | <b>Necrotic (%)</b> | <b>Early/late apoptotic (%)</b> |
|--------------|------------------|---------------------|---------------------------------|
| <b>PC3</b>   | Ctr              | 4.06 ± 0.61         | 3.03 ± 0.7                      |
|              | 10 nM            | 5.11± 0.51          | 2.44 ± 0.12                     |
|              | 20 nM            | 4.52± 0.85          | 2.61 ±0.24                      |
|              | 50 nM            | 4.86±0.84           | 3.26 ±0.55                      |
|              | 100 nM           | 4.28±1.25           | 4.04 ±0.16                      |
| <b>PC3RR</b> | Ctr              | 5.66 ± 1.94         | 3.53 ± 1.34                     |
|              | 10 nM            | 7.85 ± 1.42         | 3.69 ± 0.44                     |
|              | 20 nM            | 9.36 ±1.91          | 5.5 ± 0.74                      |
|              | 50 nM            | 13.89 ± 2.02        | 12.97 ± 2.74                    |
|              | 100 nM           | 19.78 ± 4.78        | 14.42 ± 1.30                    |
