# Supplementary material for: Radioresistance Mechanisms in Prostate Cancer Cell Lines Surviving Ultra-Hypo-Fractionated EBRT: Implications and Possible Clinical Applications
Source: MDPI journal article supplement (doi:10.3390/cancers14225504), 2022-11-09
Supplement: s1 [file s1]

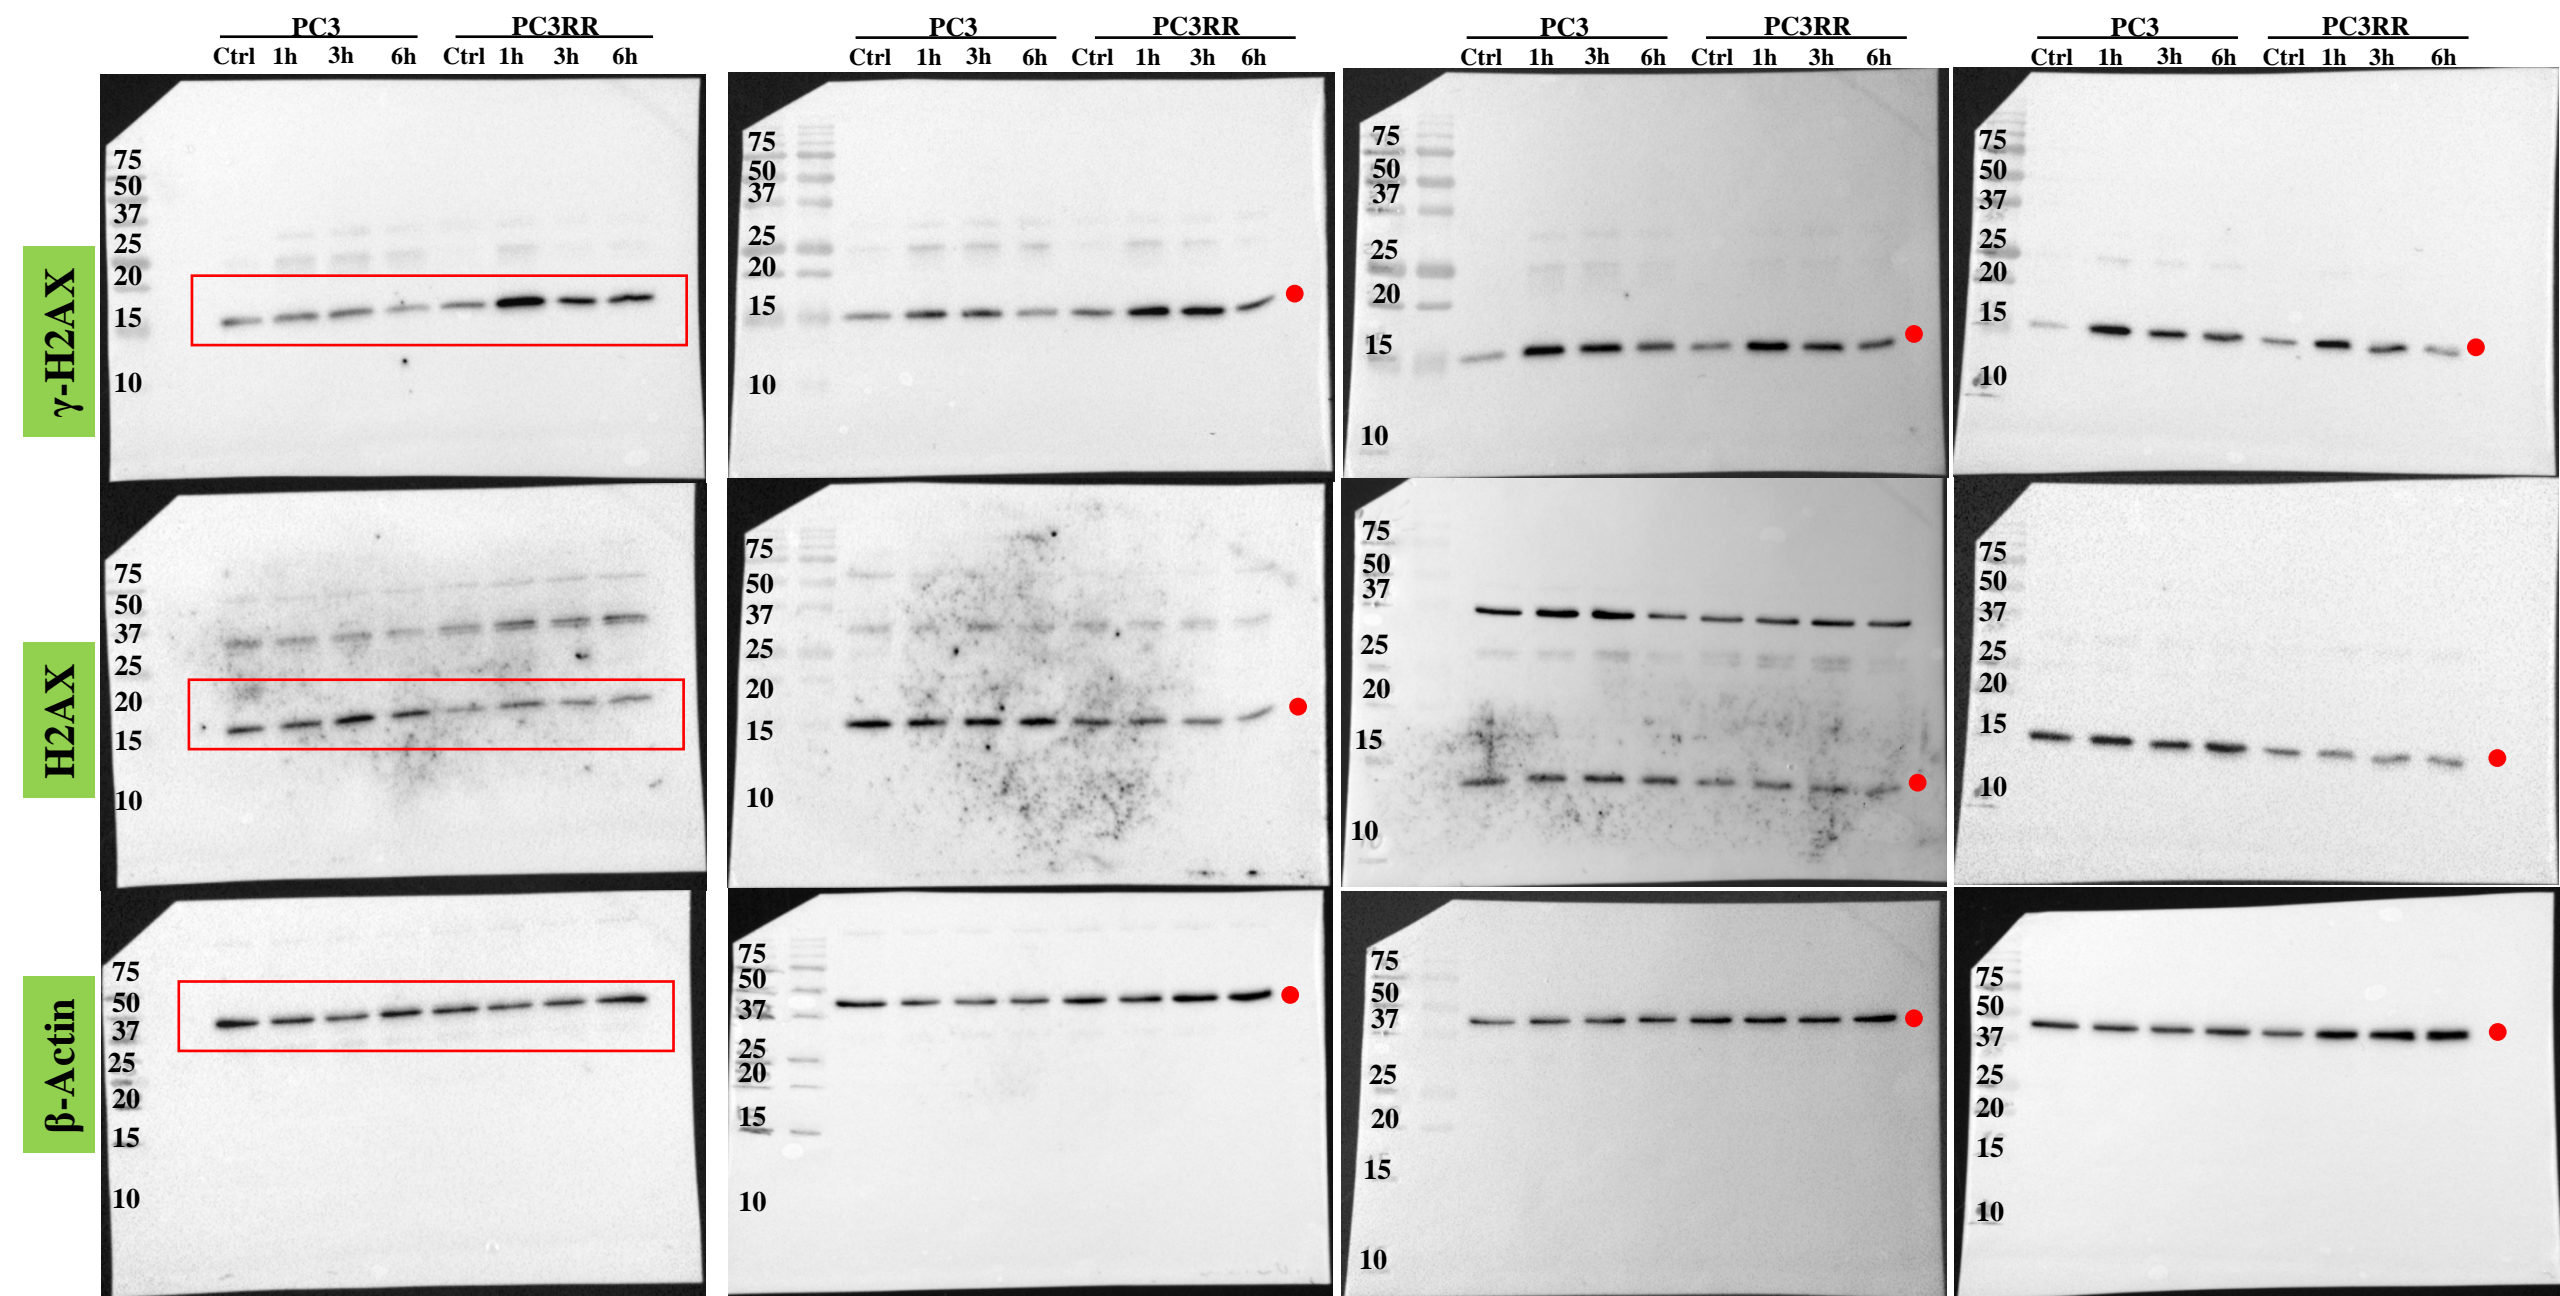

Figure. S3A

The **RED BOXES** indicates the lanes of the WB selected for the figures included in the paper

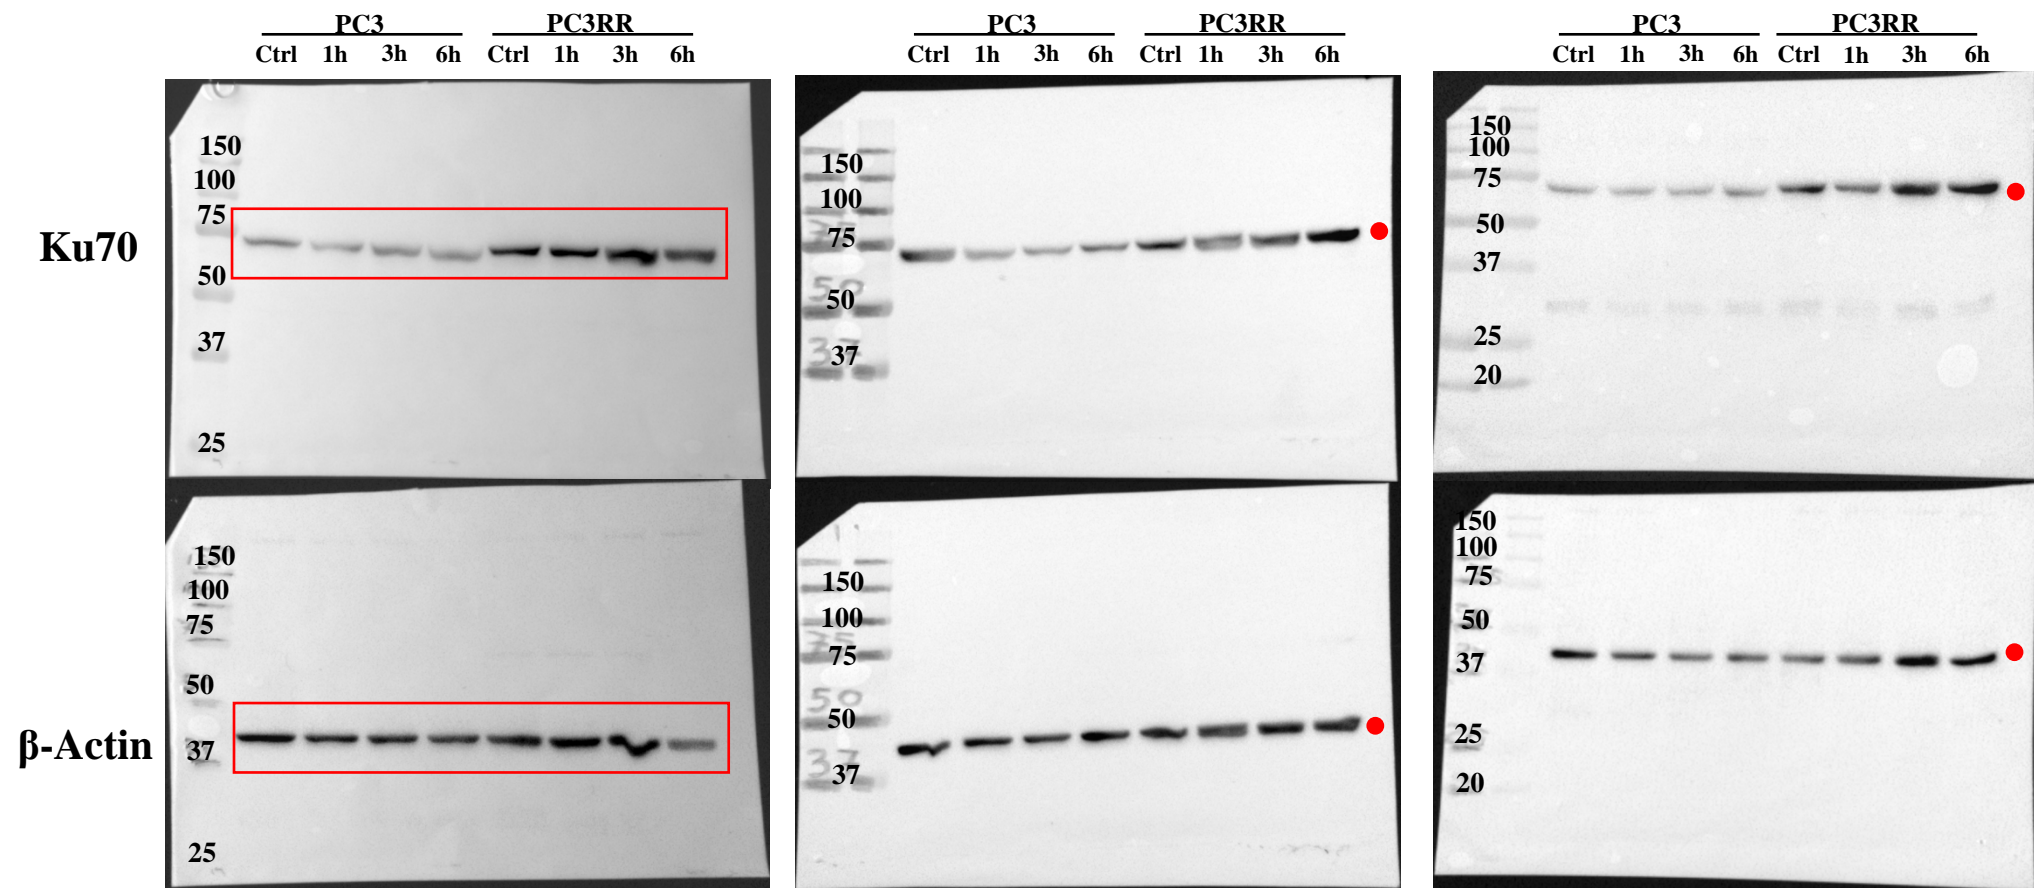

Figure. S3B



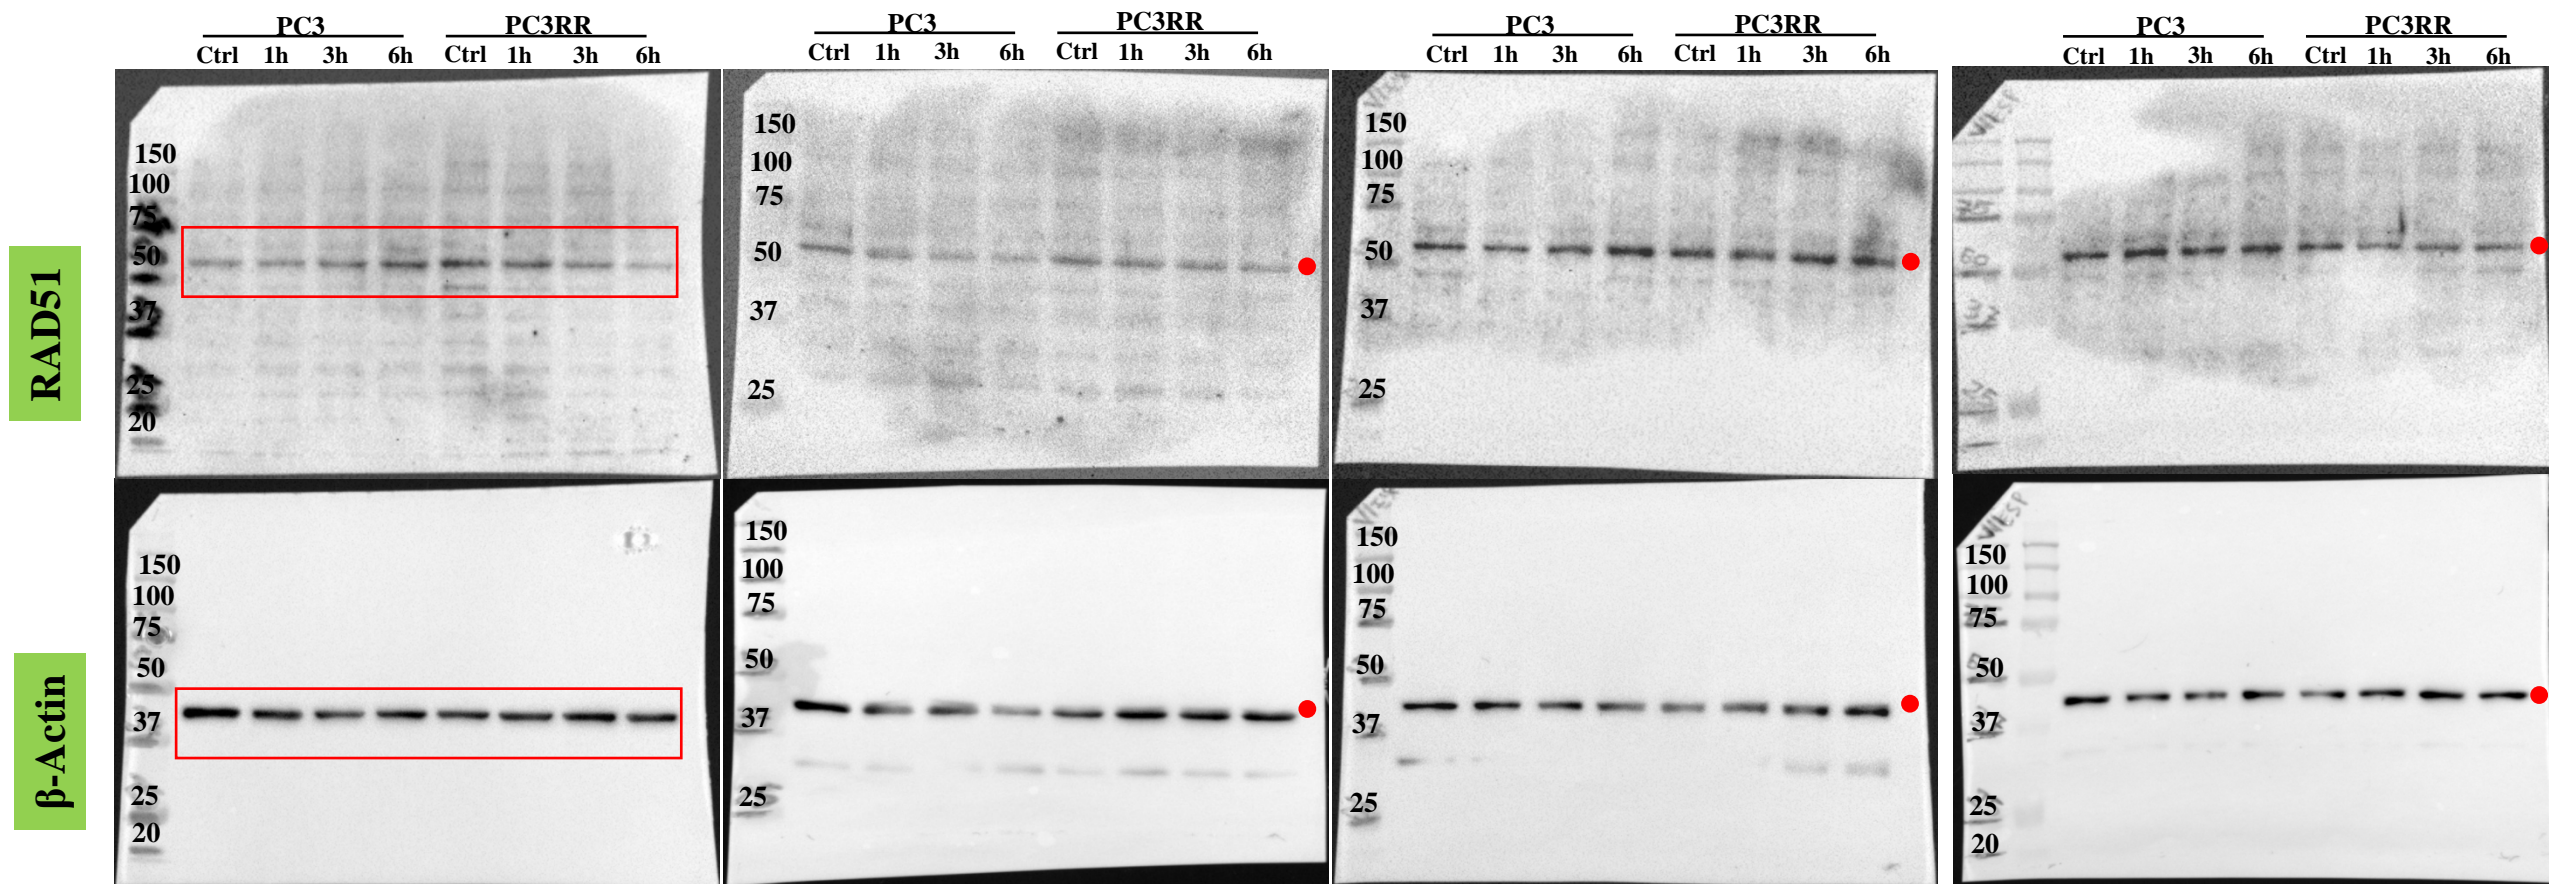

Figure. S3C

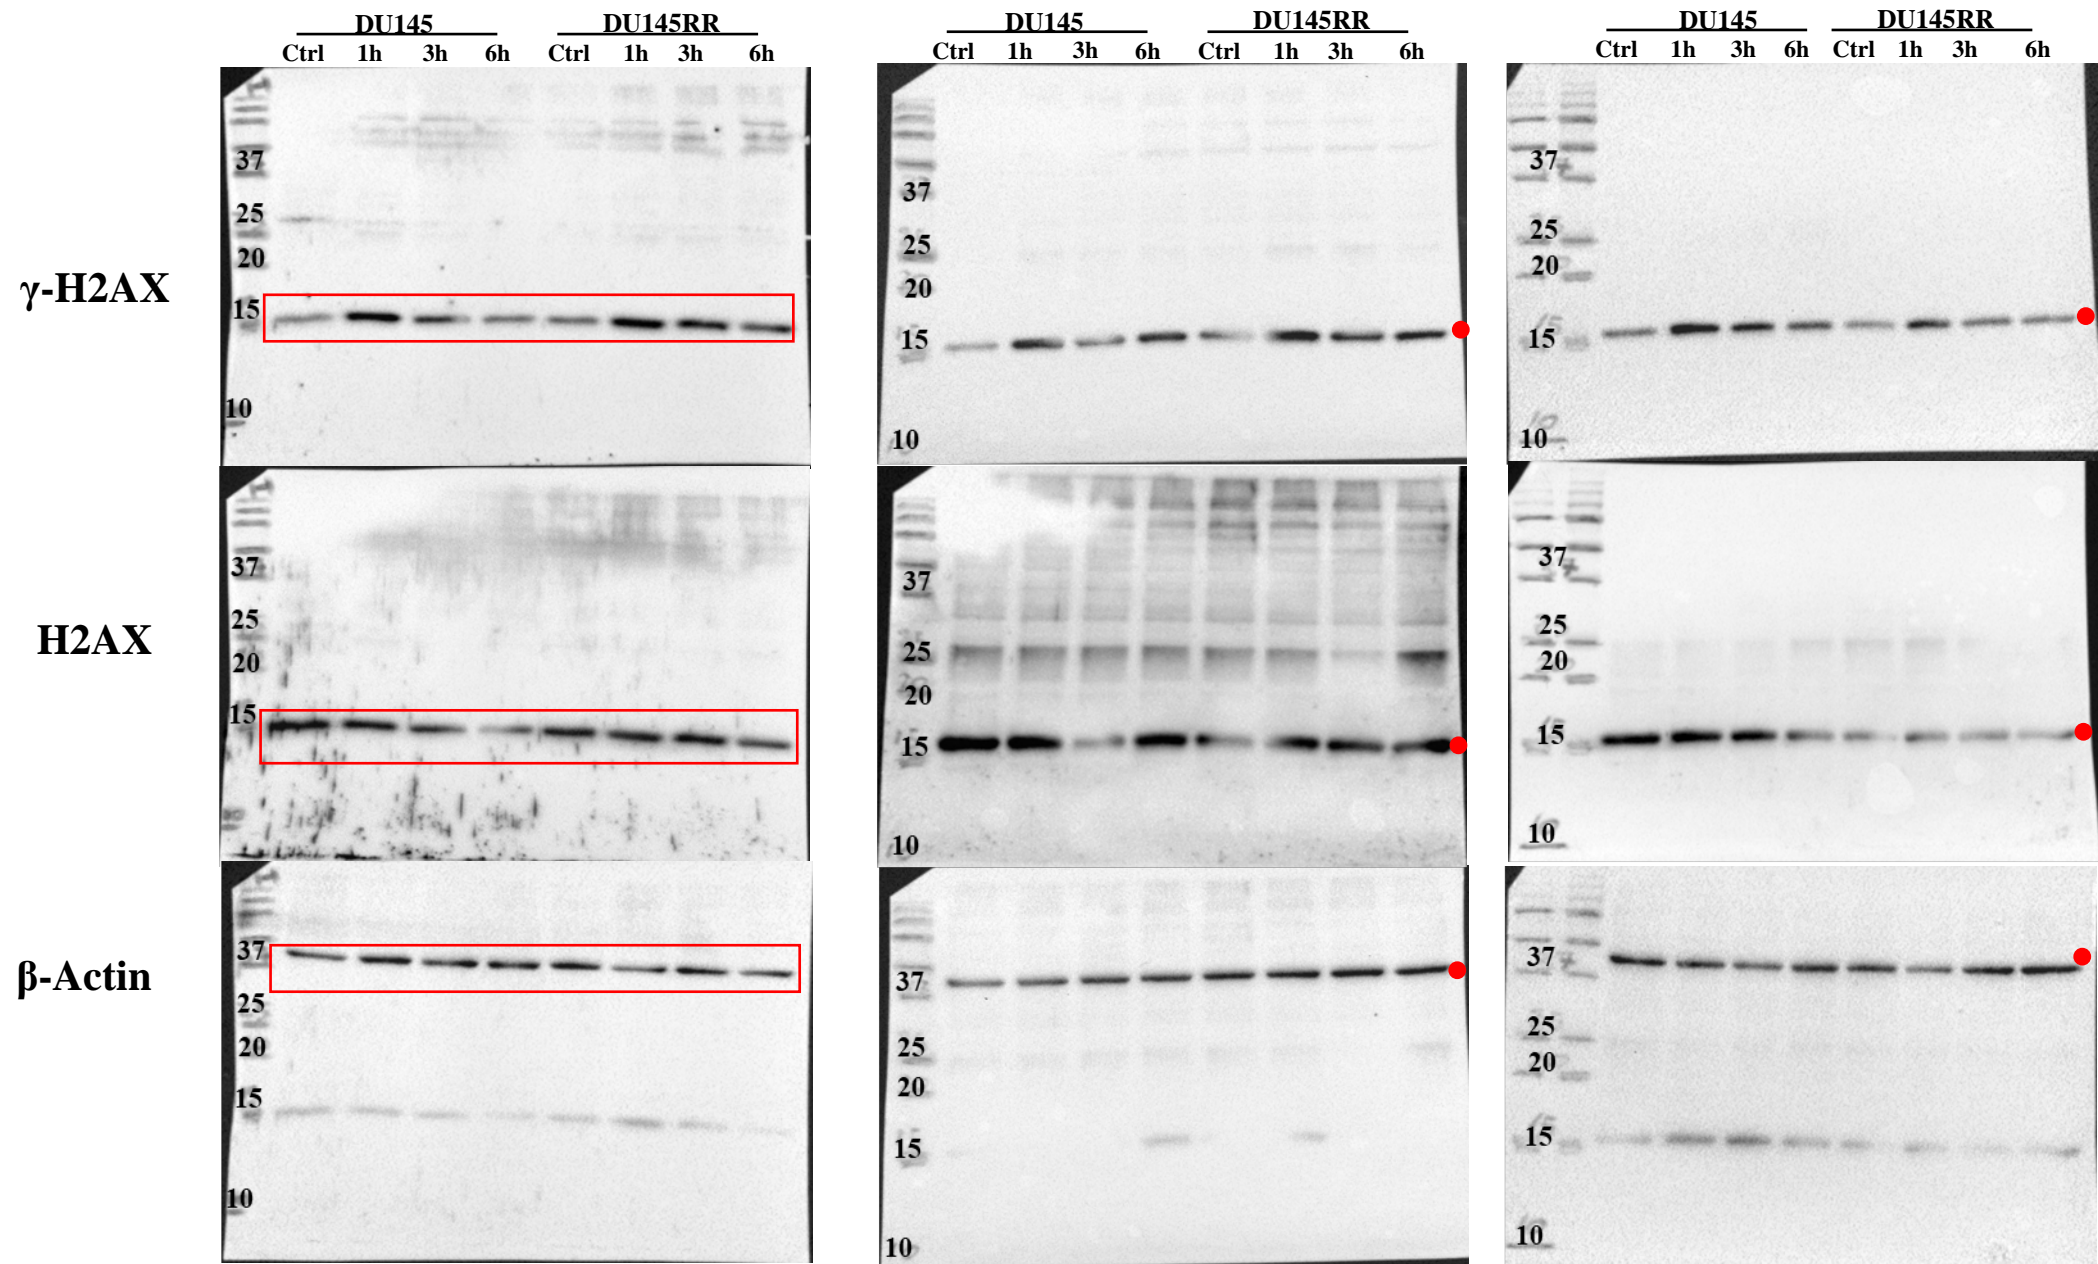

Figure. S3D



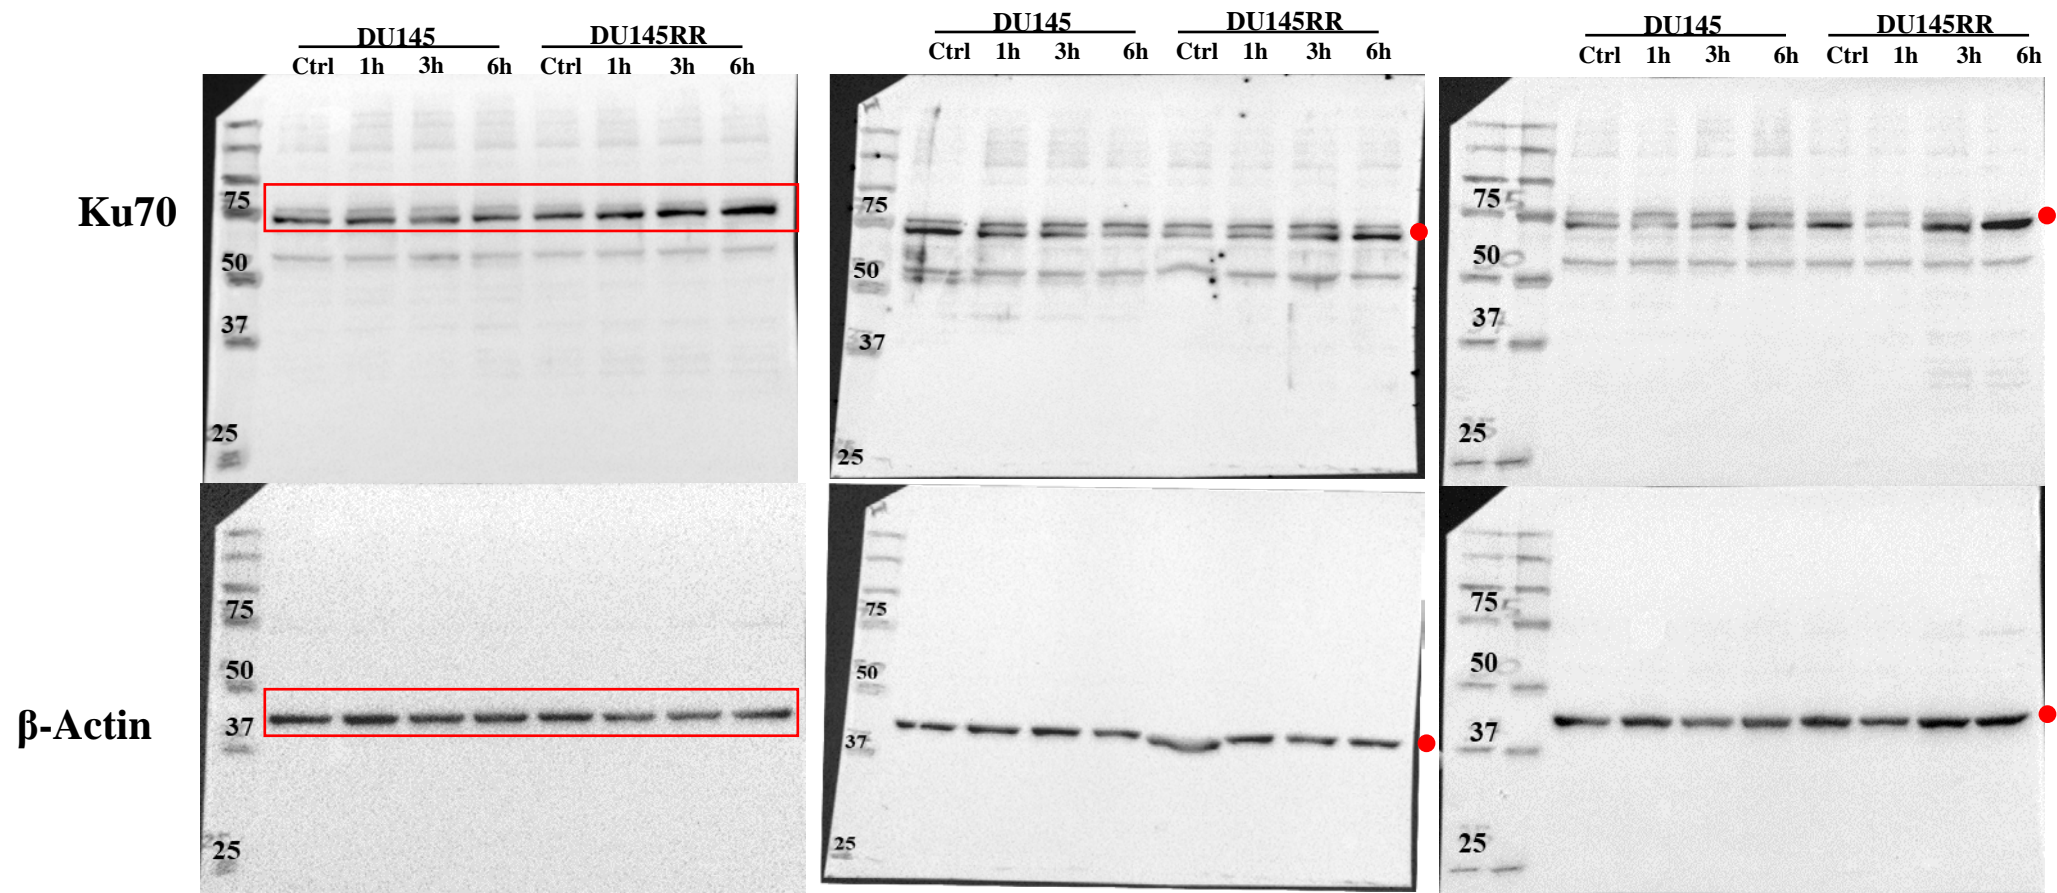

Figure. S3E

Rad51

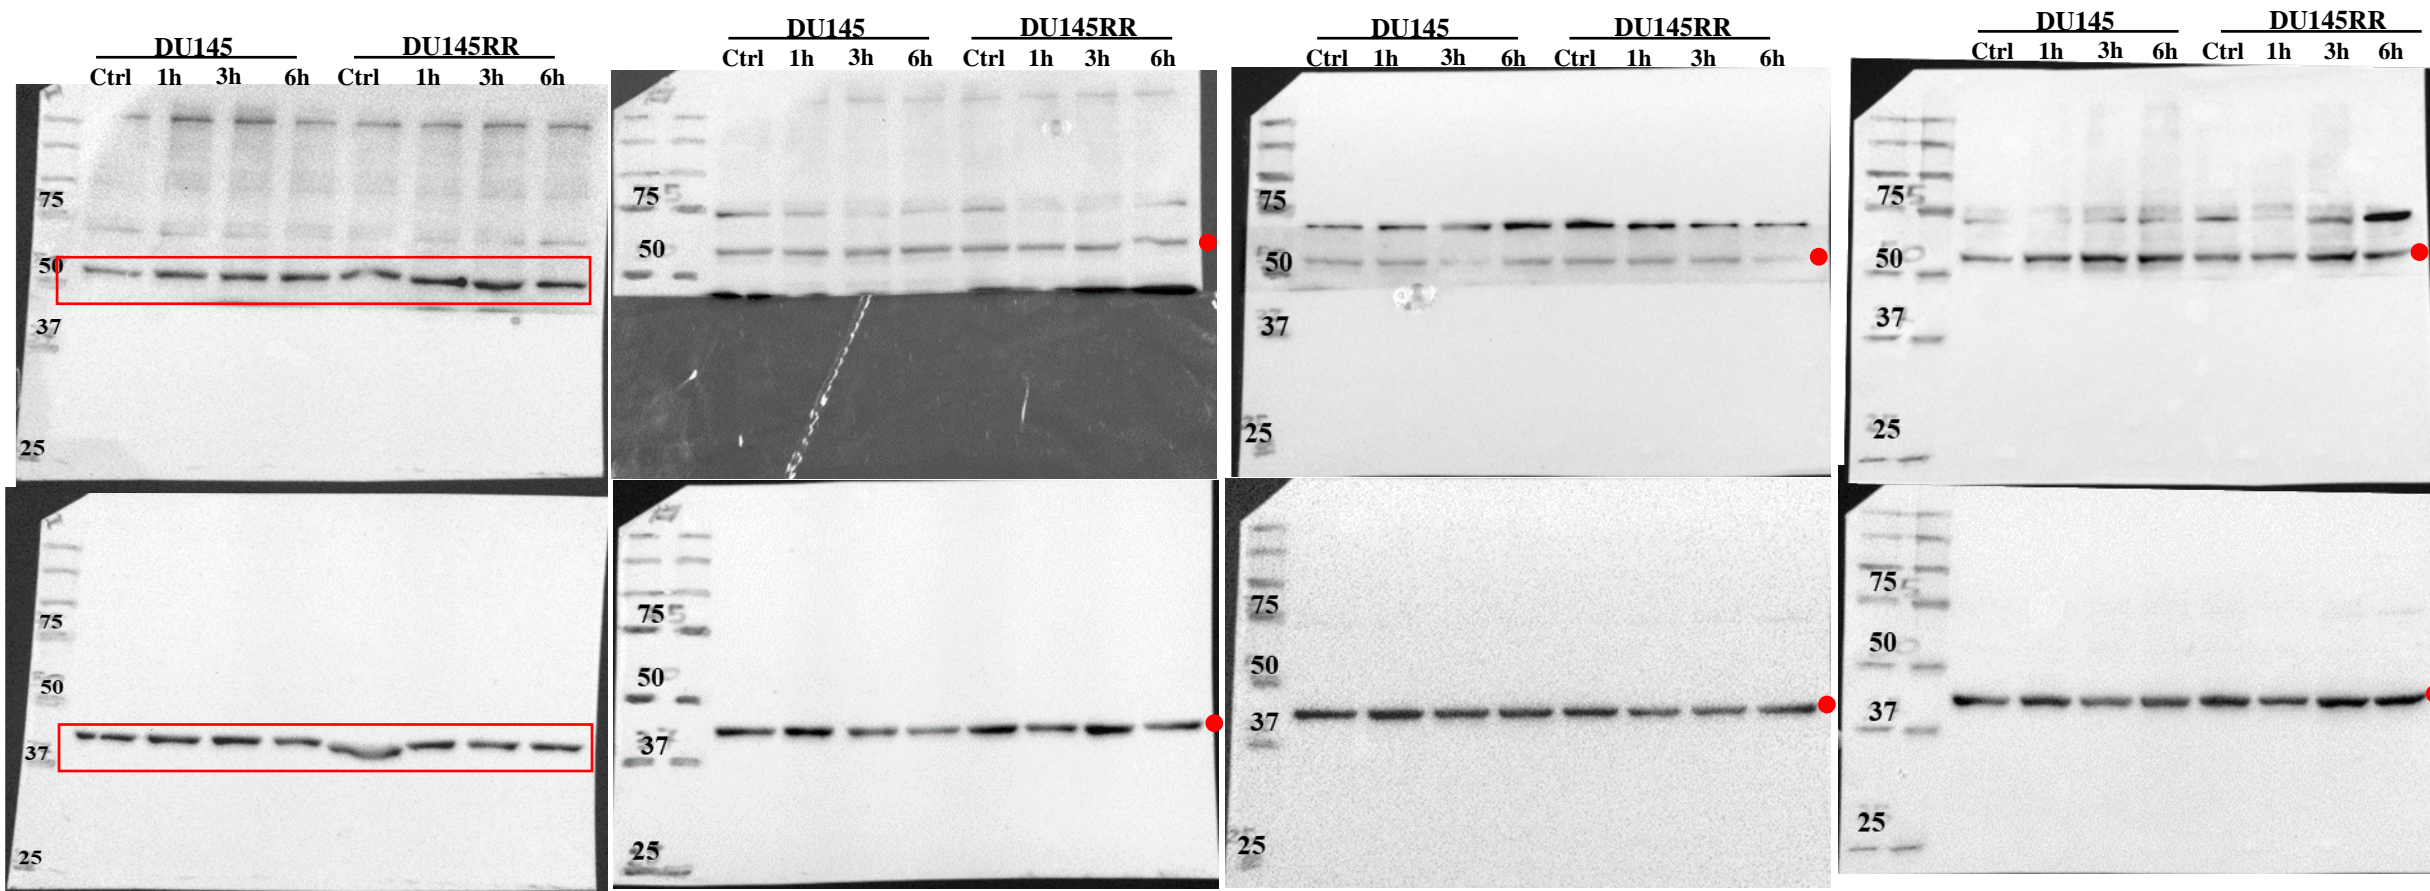

$\beta$ -Actin

Figure. S3F



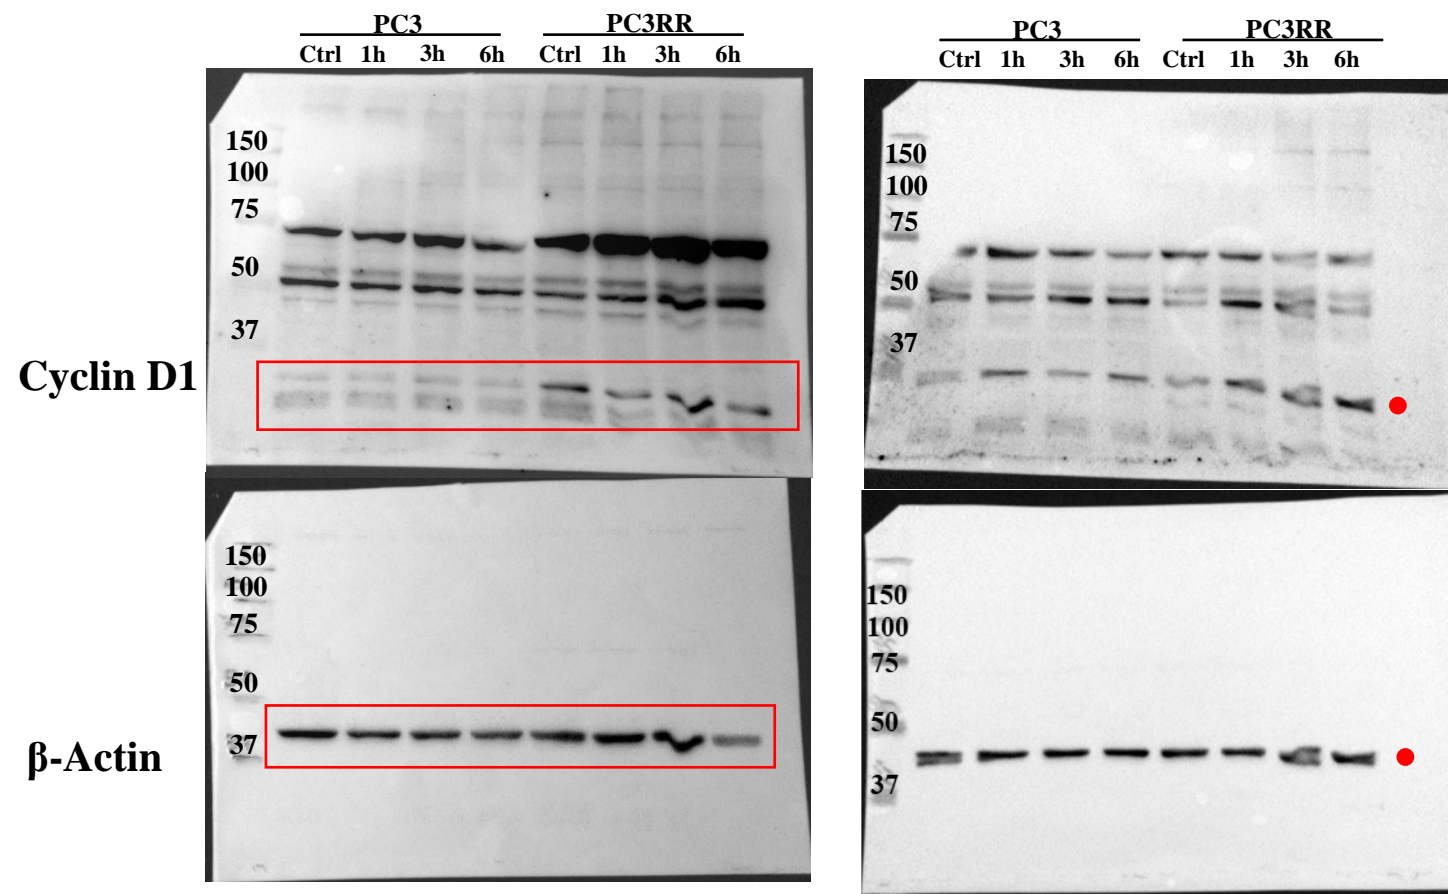

Figure. S4A

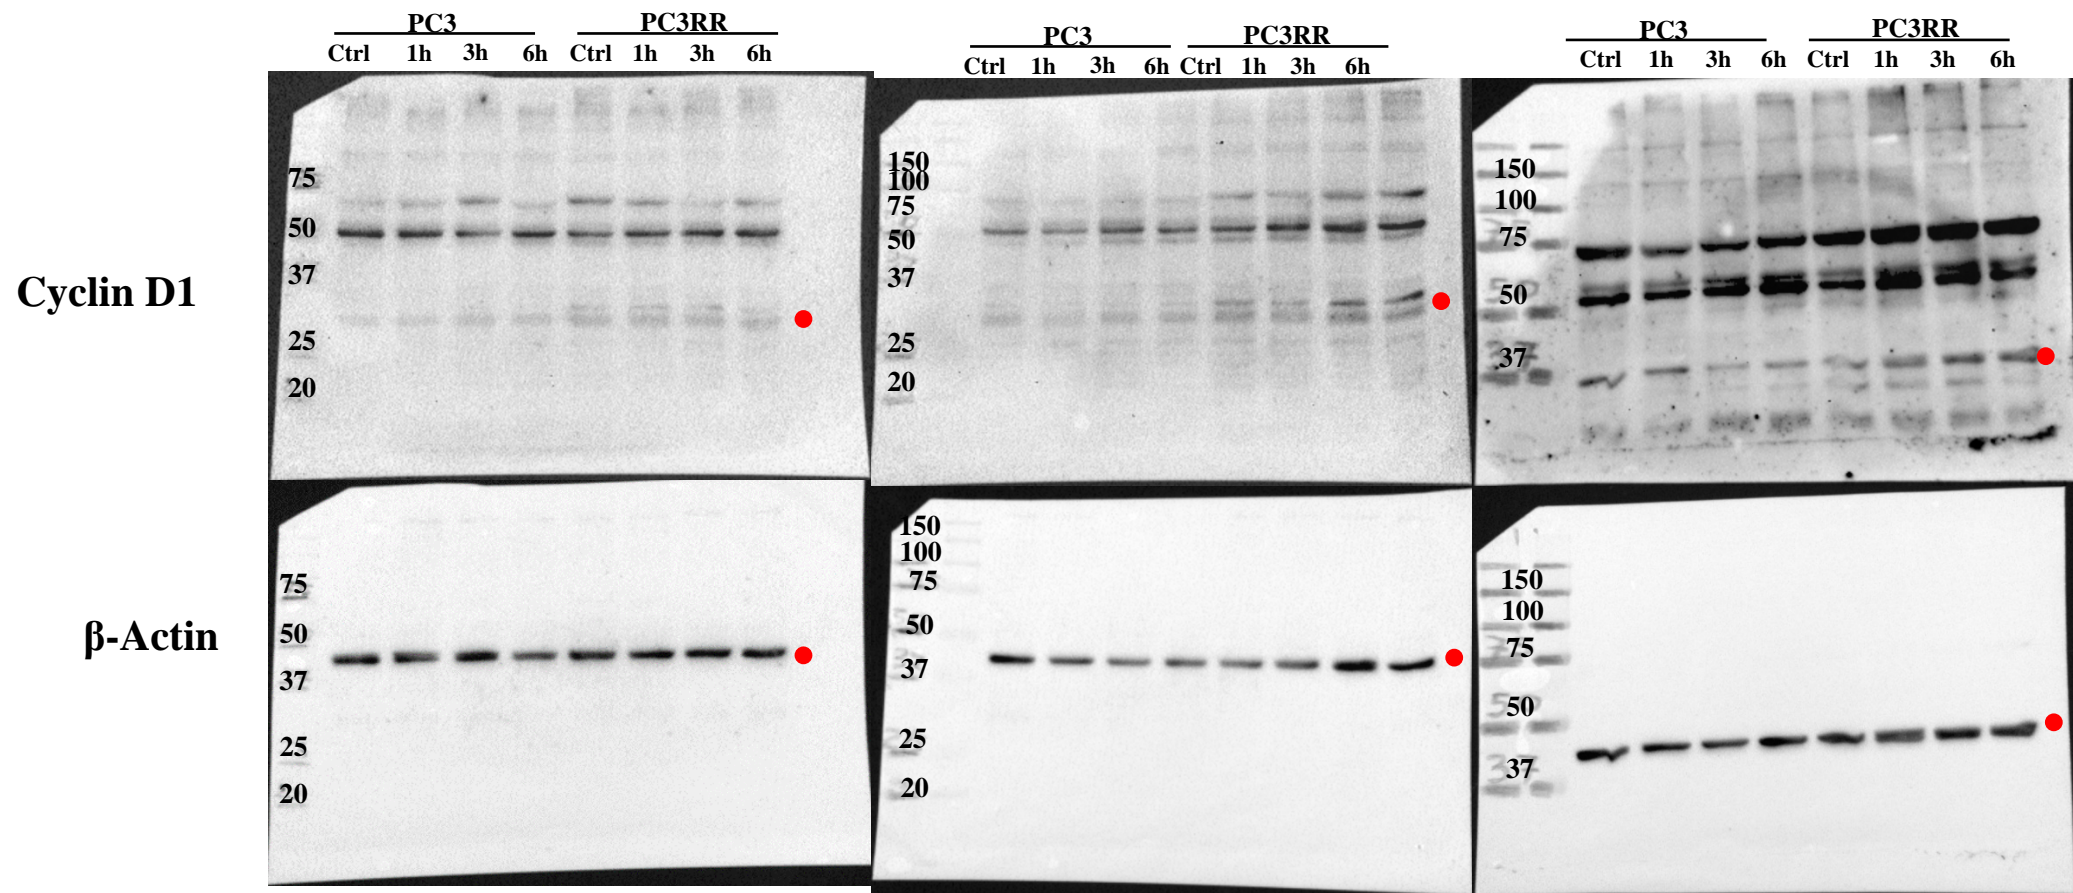

Figure. S4A bis



c-FLIP<sub>L</sub>

c-FLIP<sub>S</sub>

β-Actin

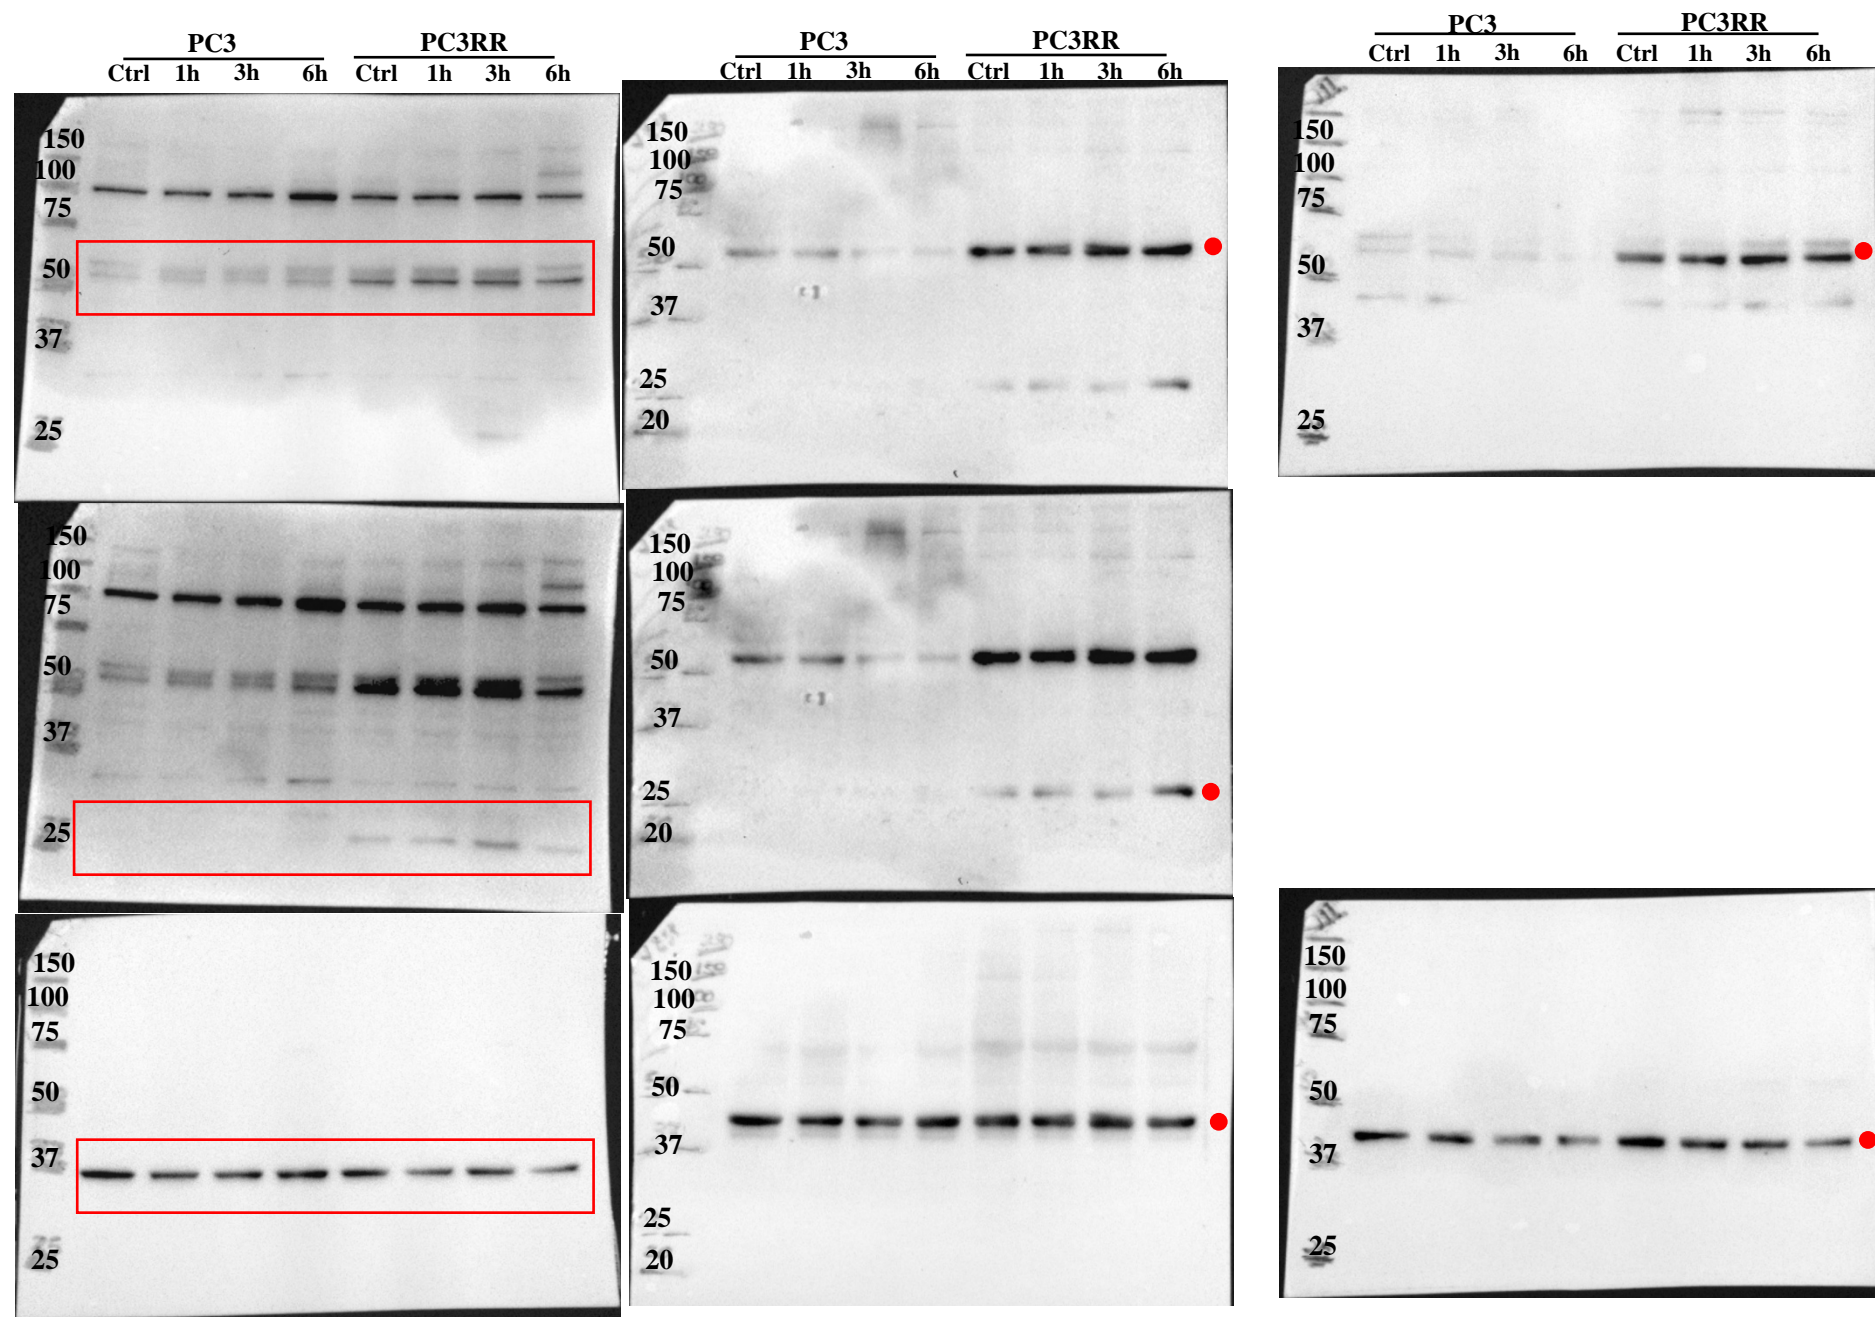

Figure. S4B

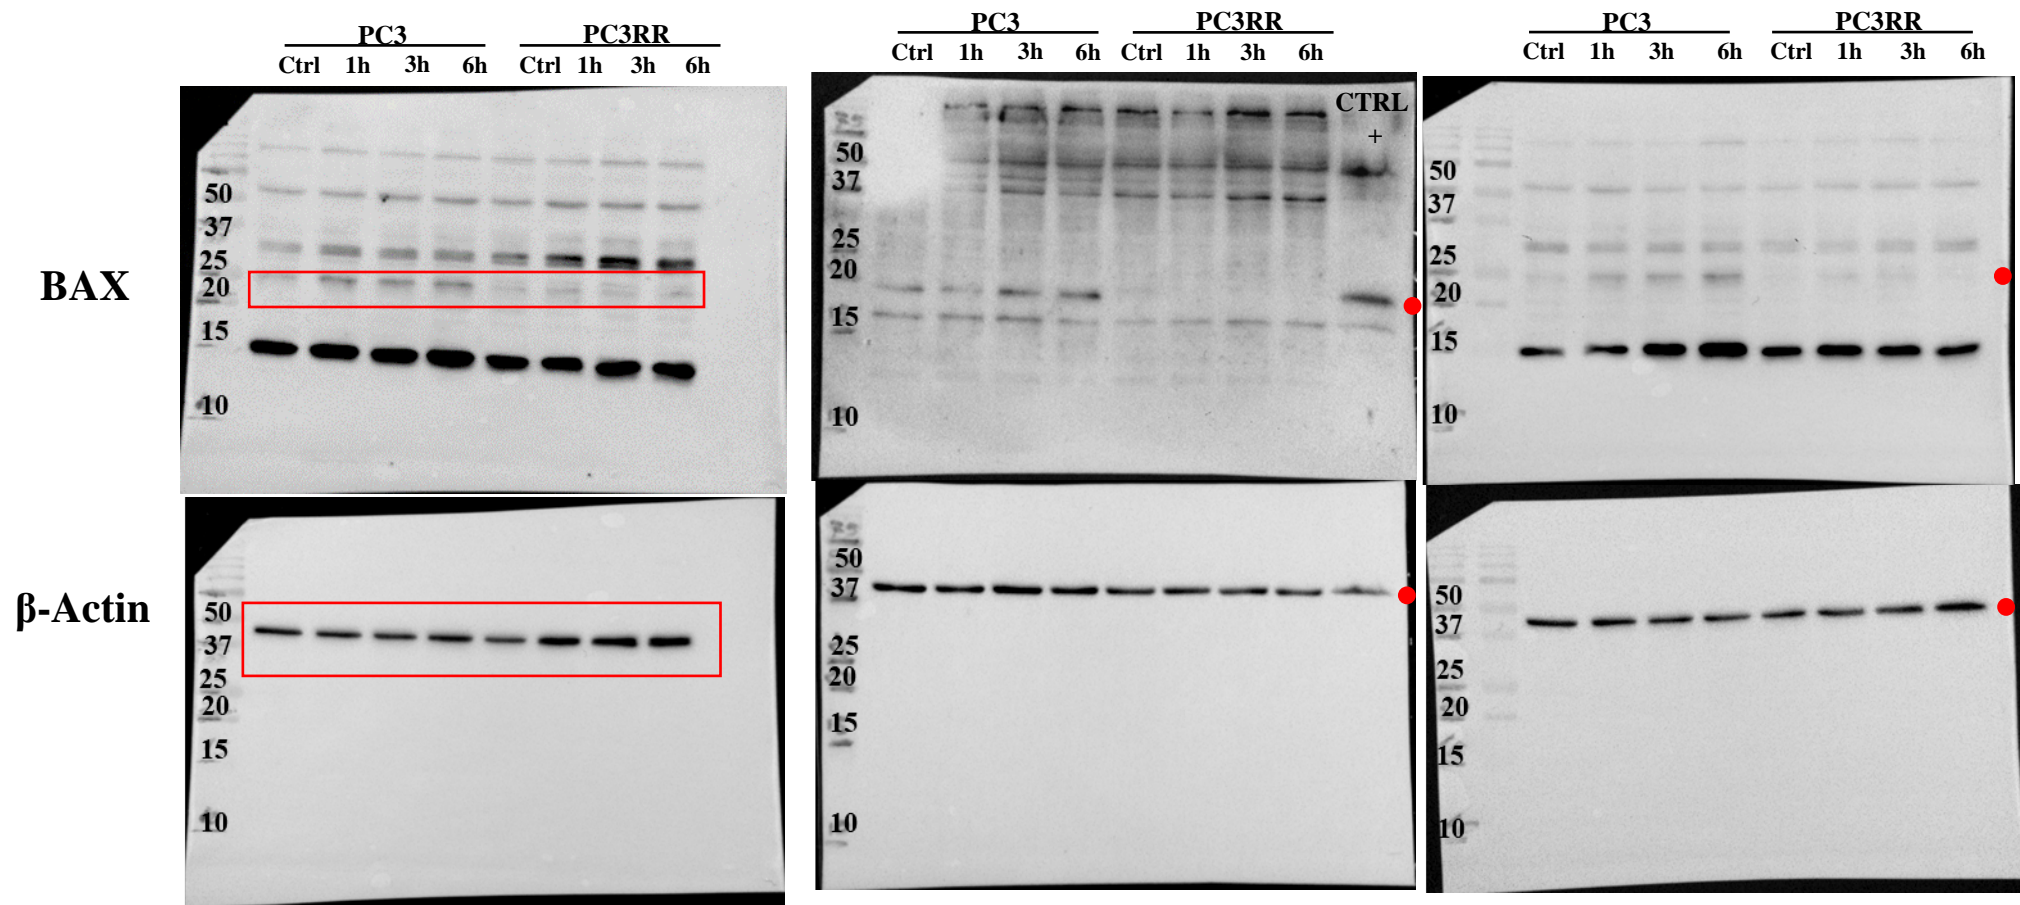

Figure. S4C



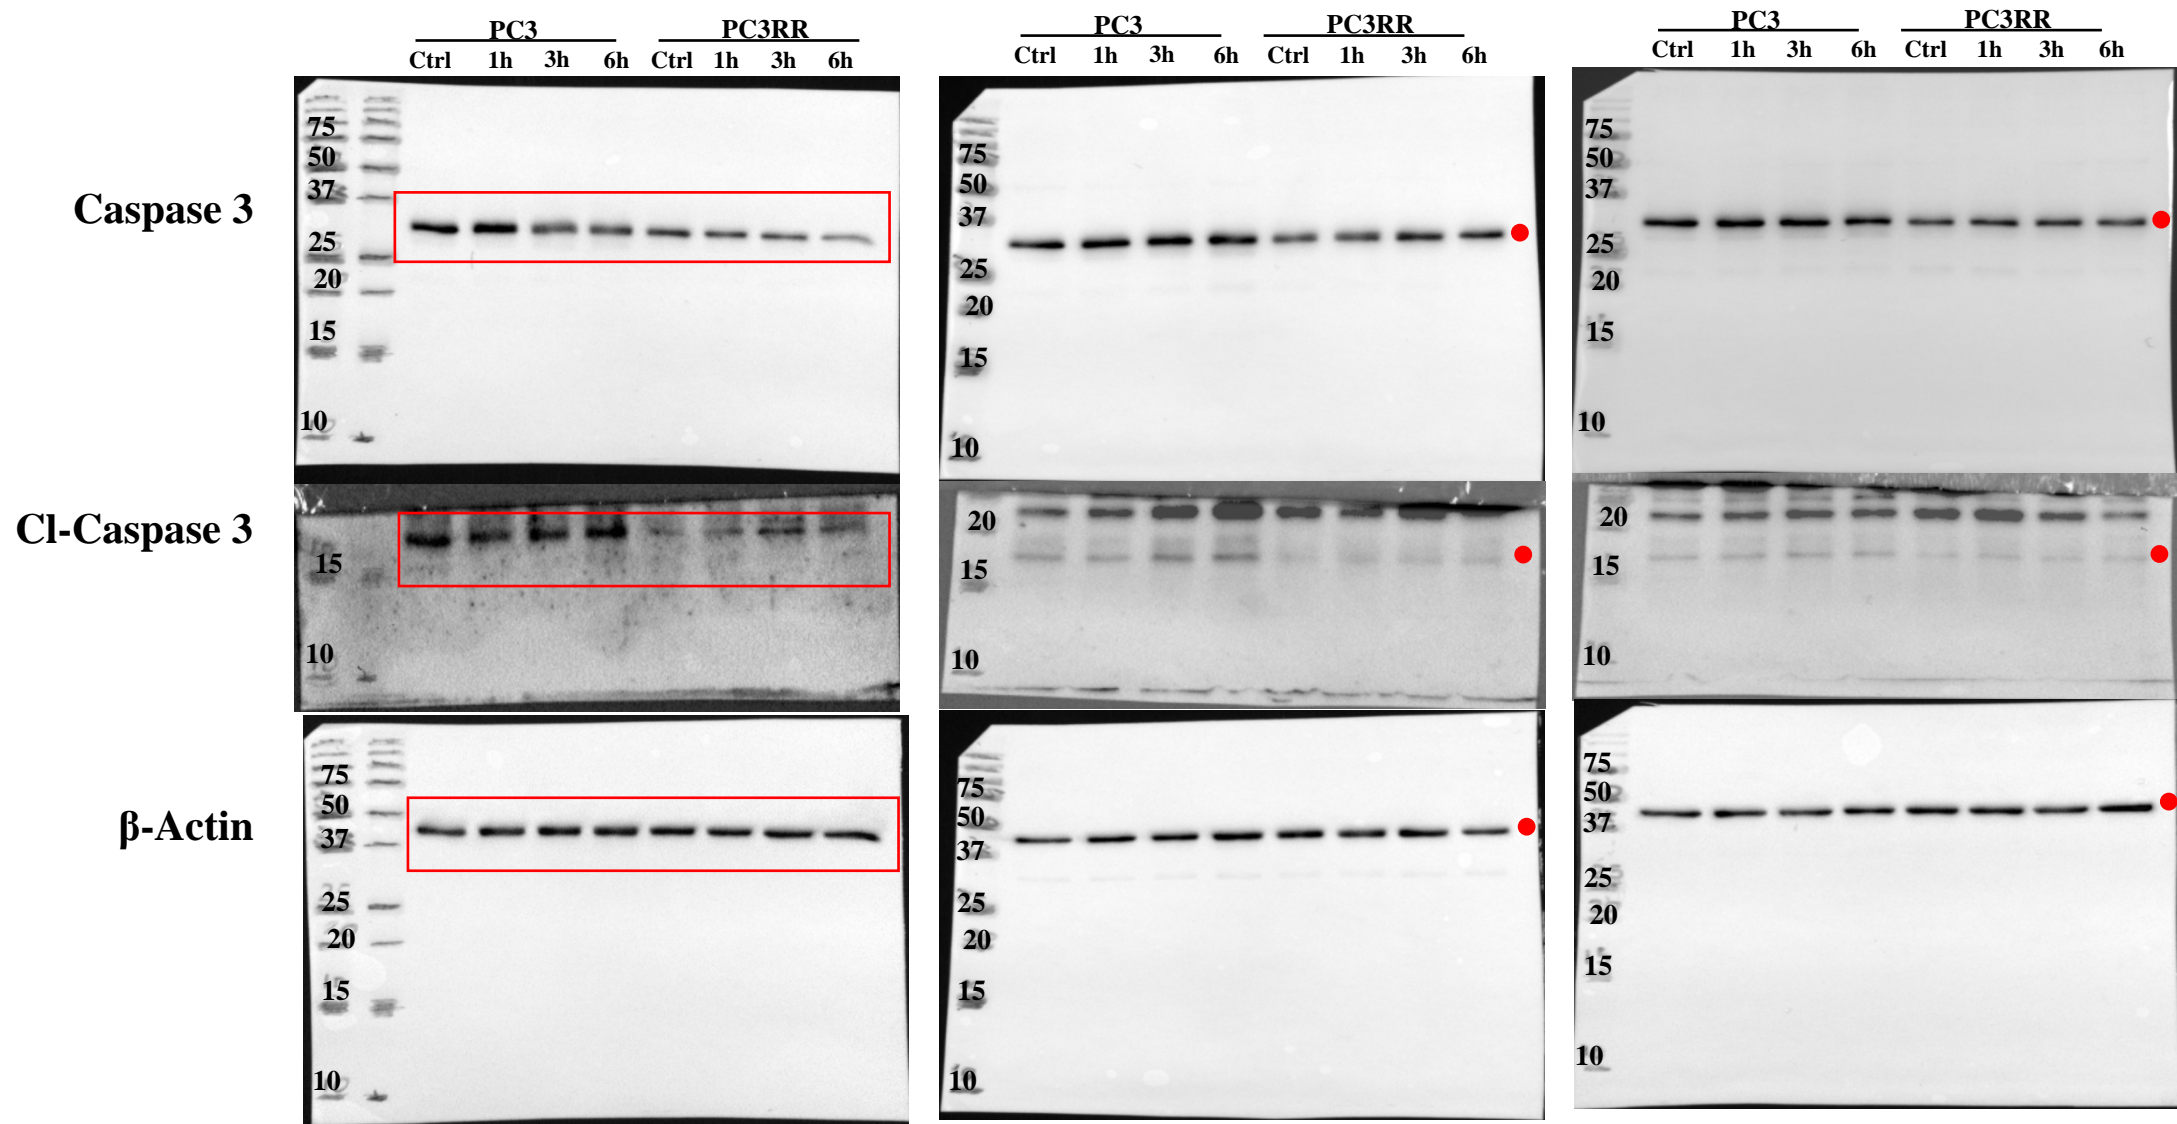

Figure. S4D

Cyclin D1

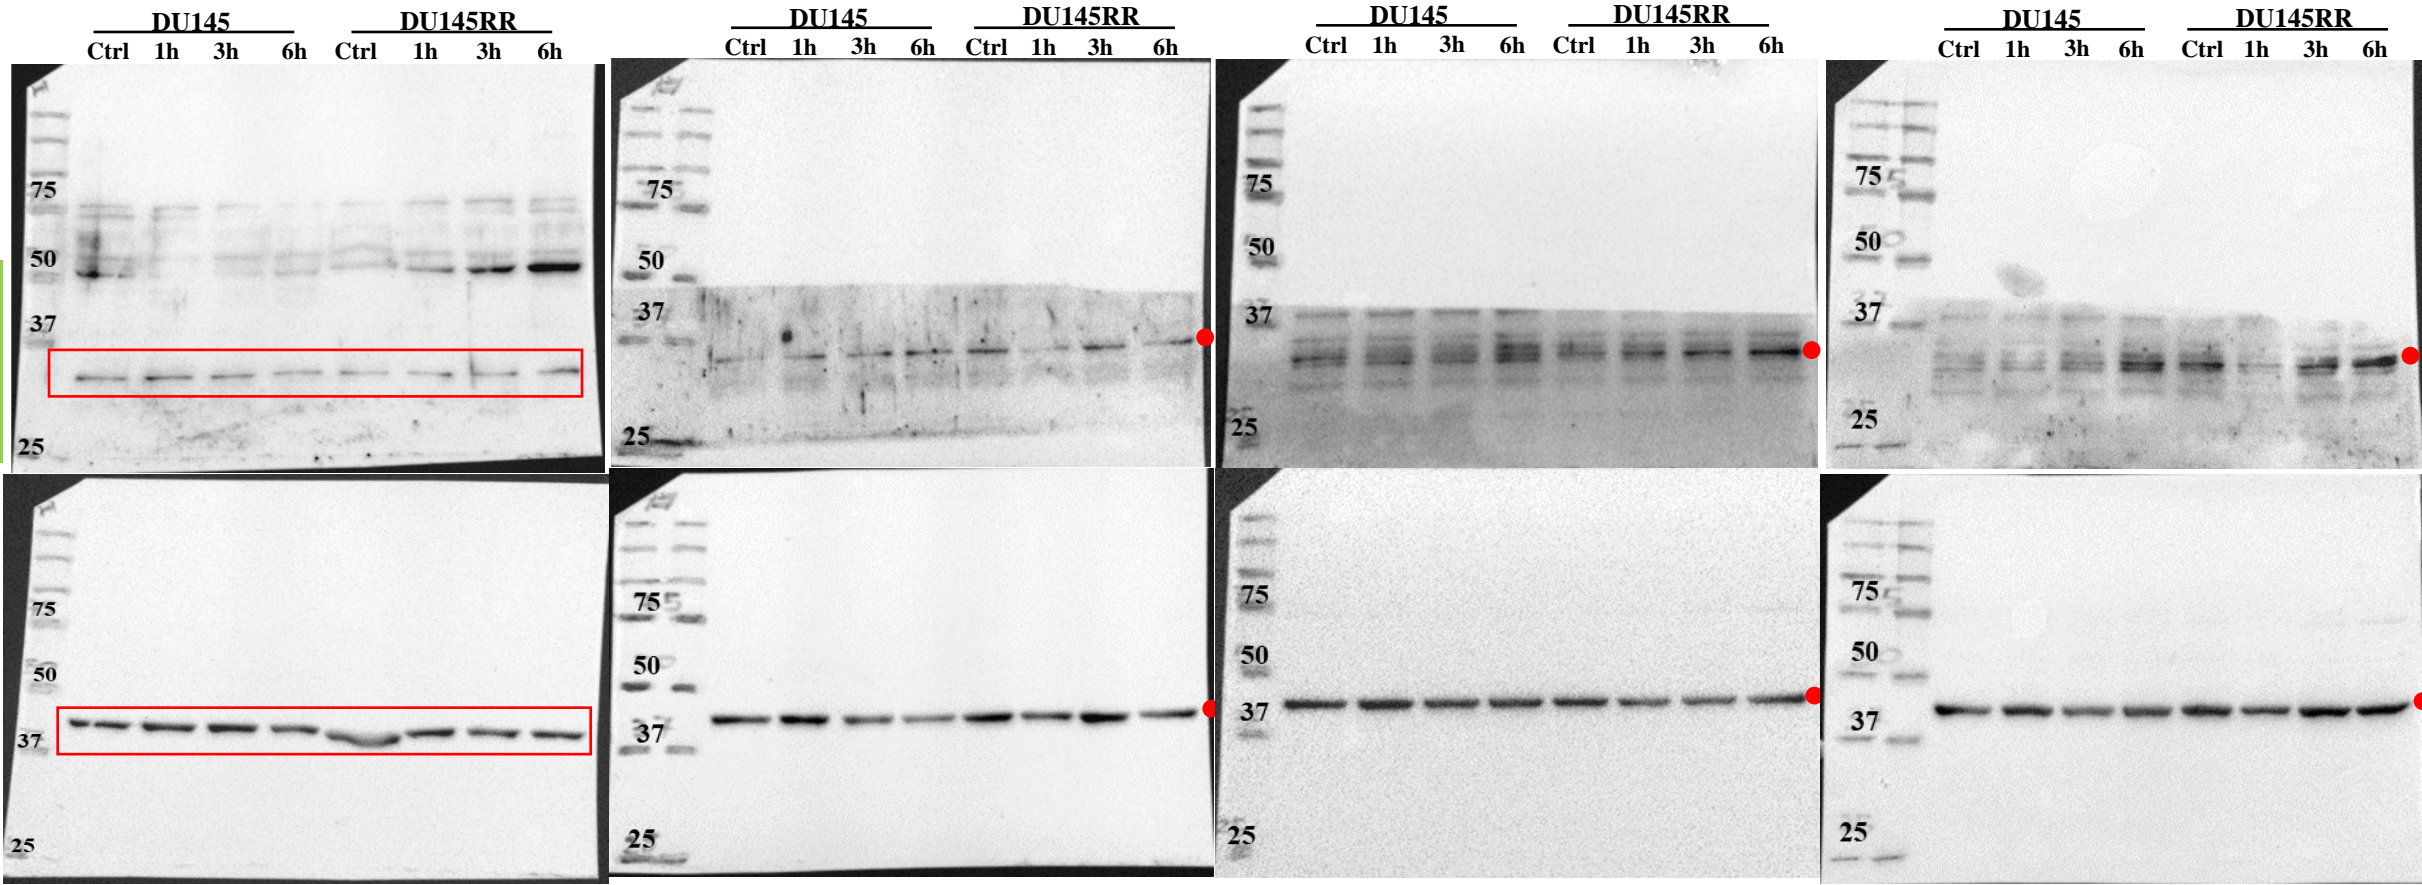

$\beta$ -Actin

Figure. S4E



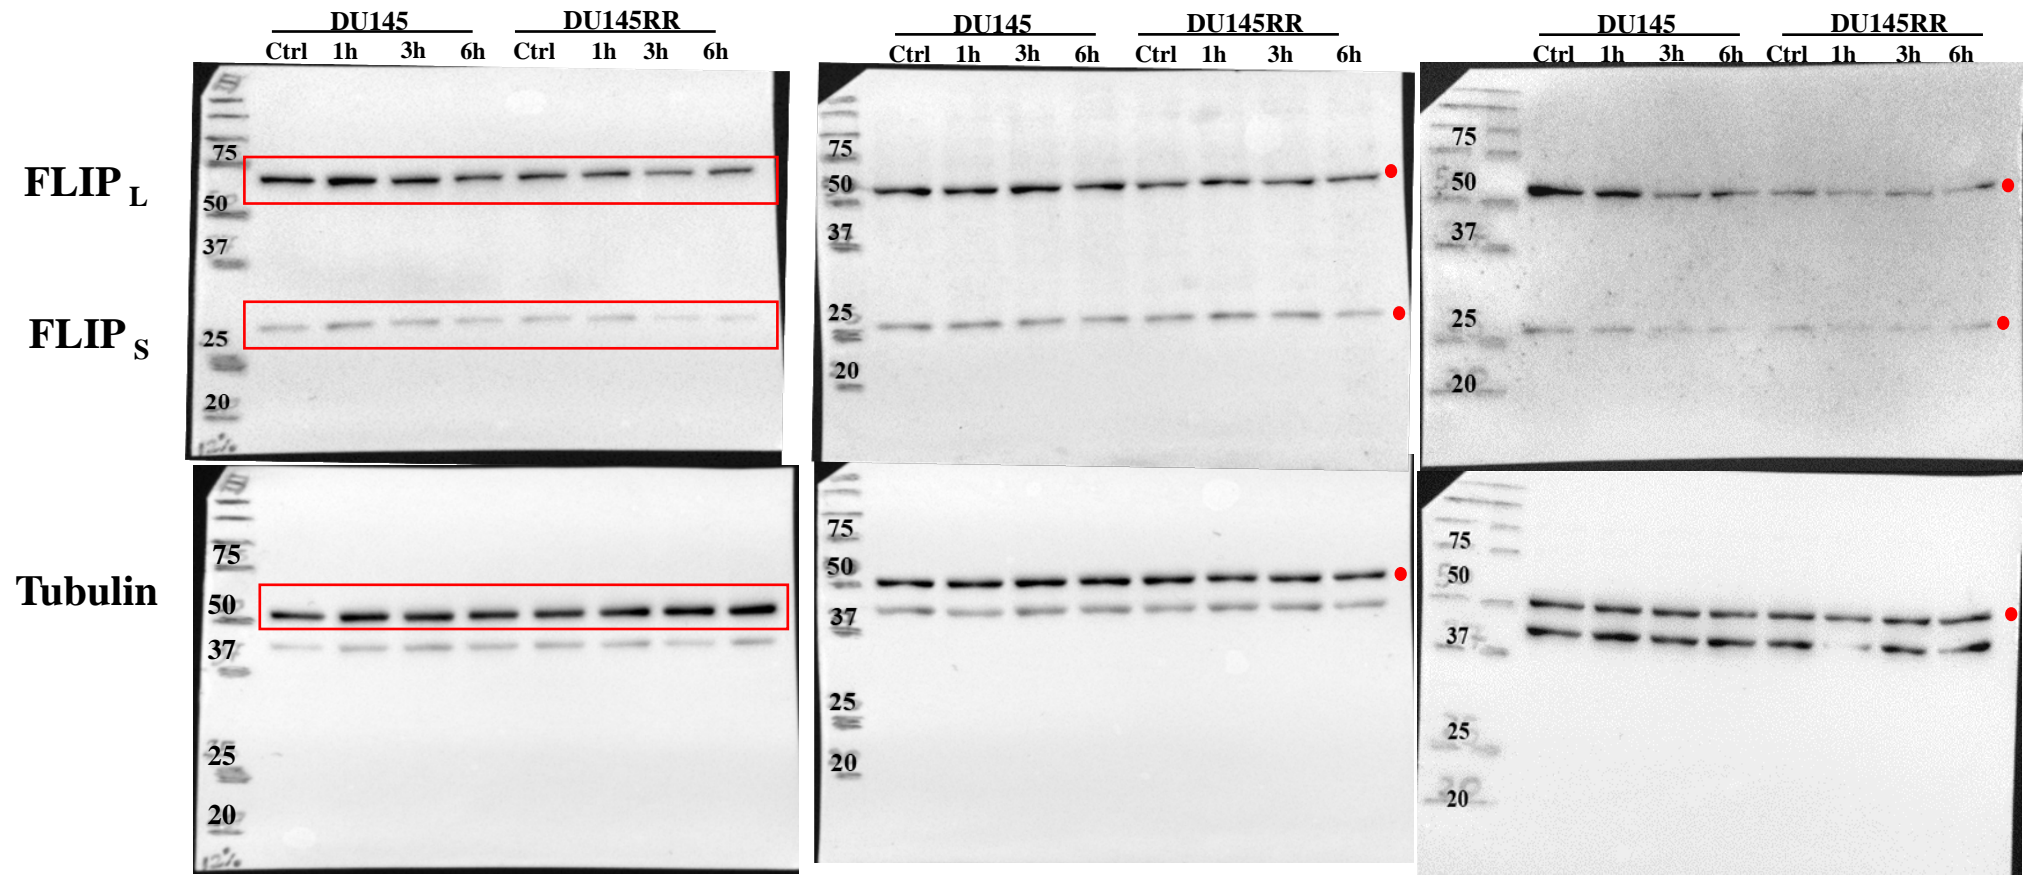

Figure. S4F

Caspase 3

Cl-Caspase 3

$\beta$ -Actin

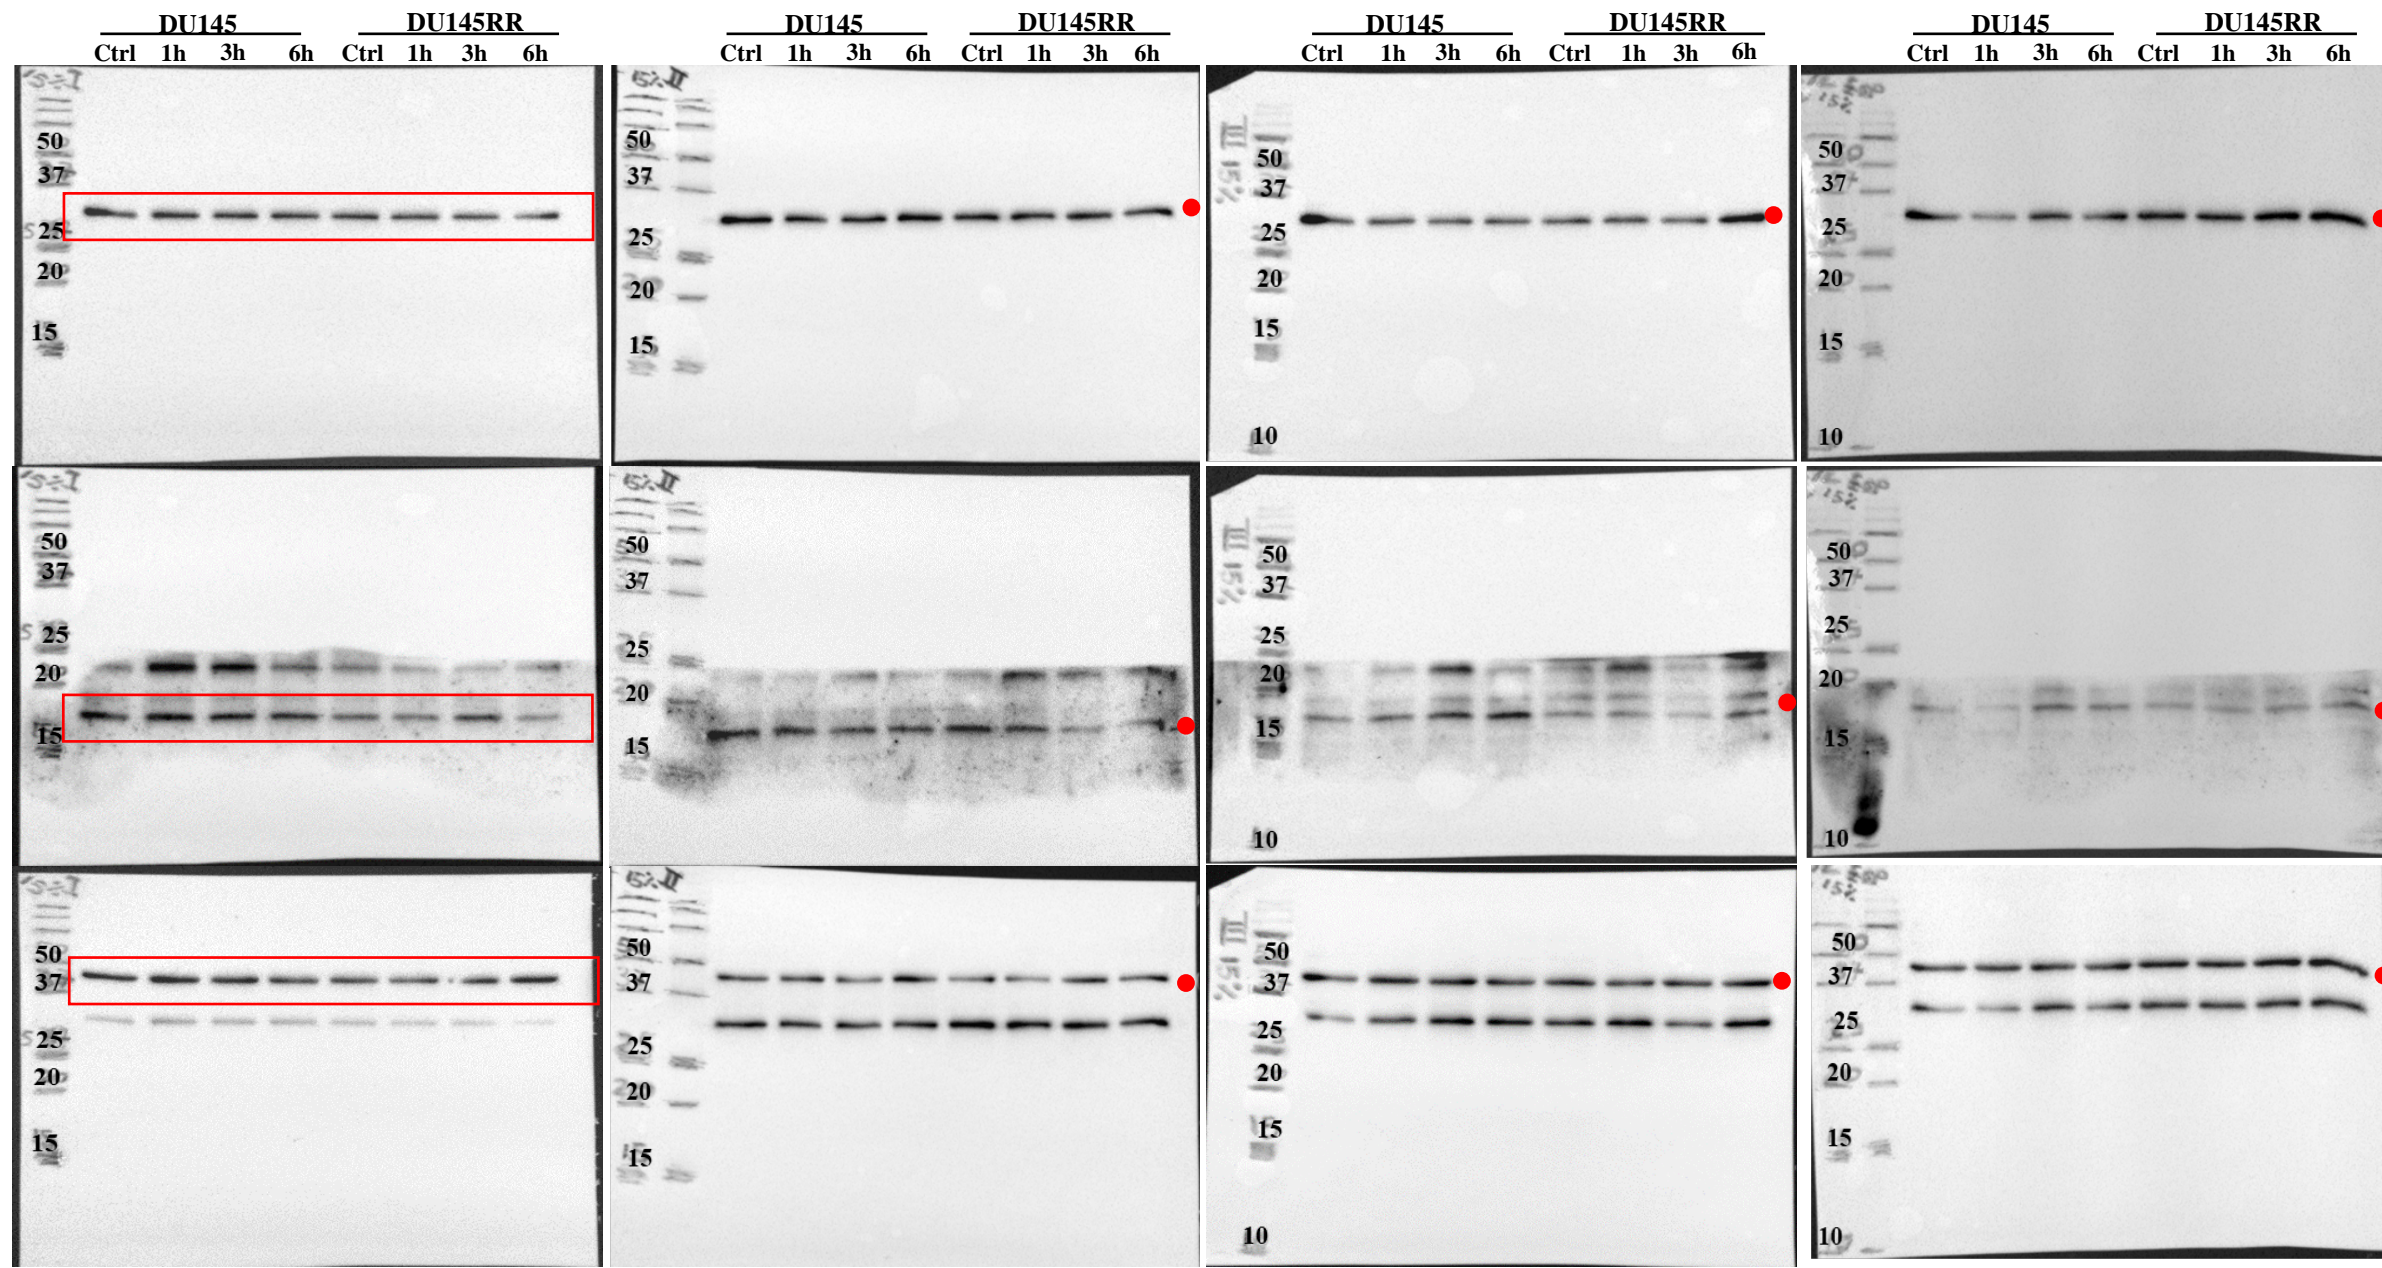

Figure. S4G



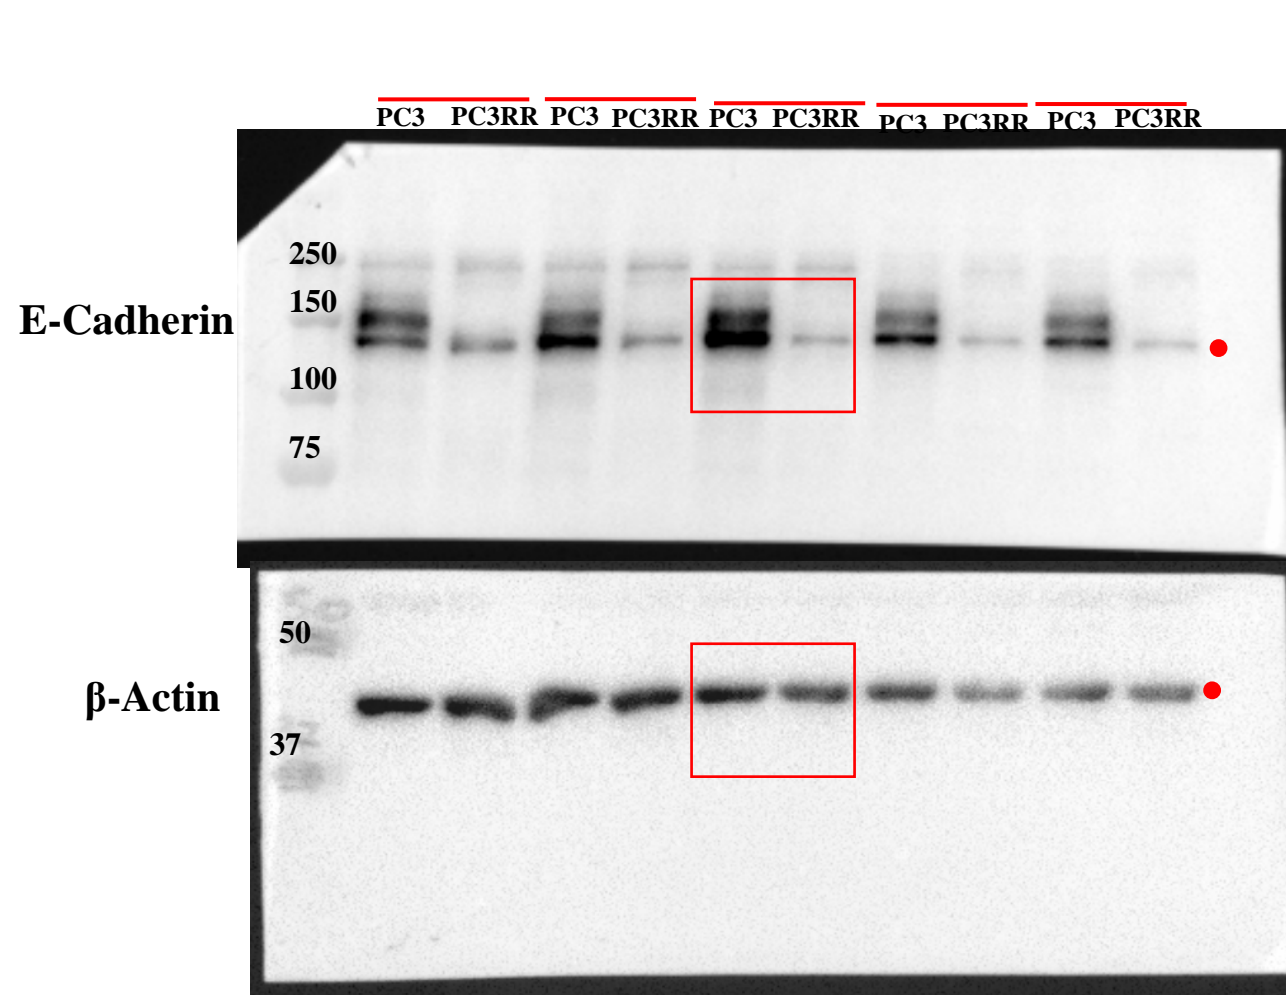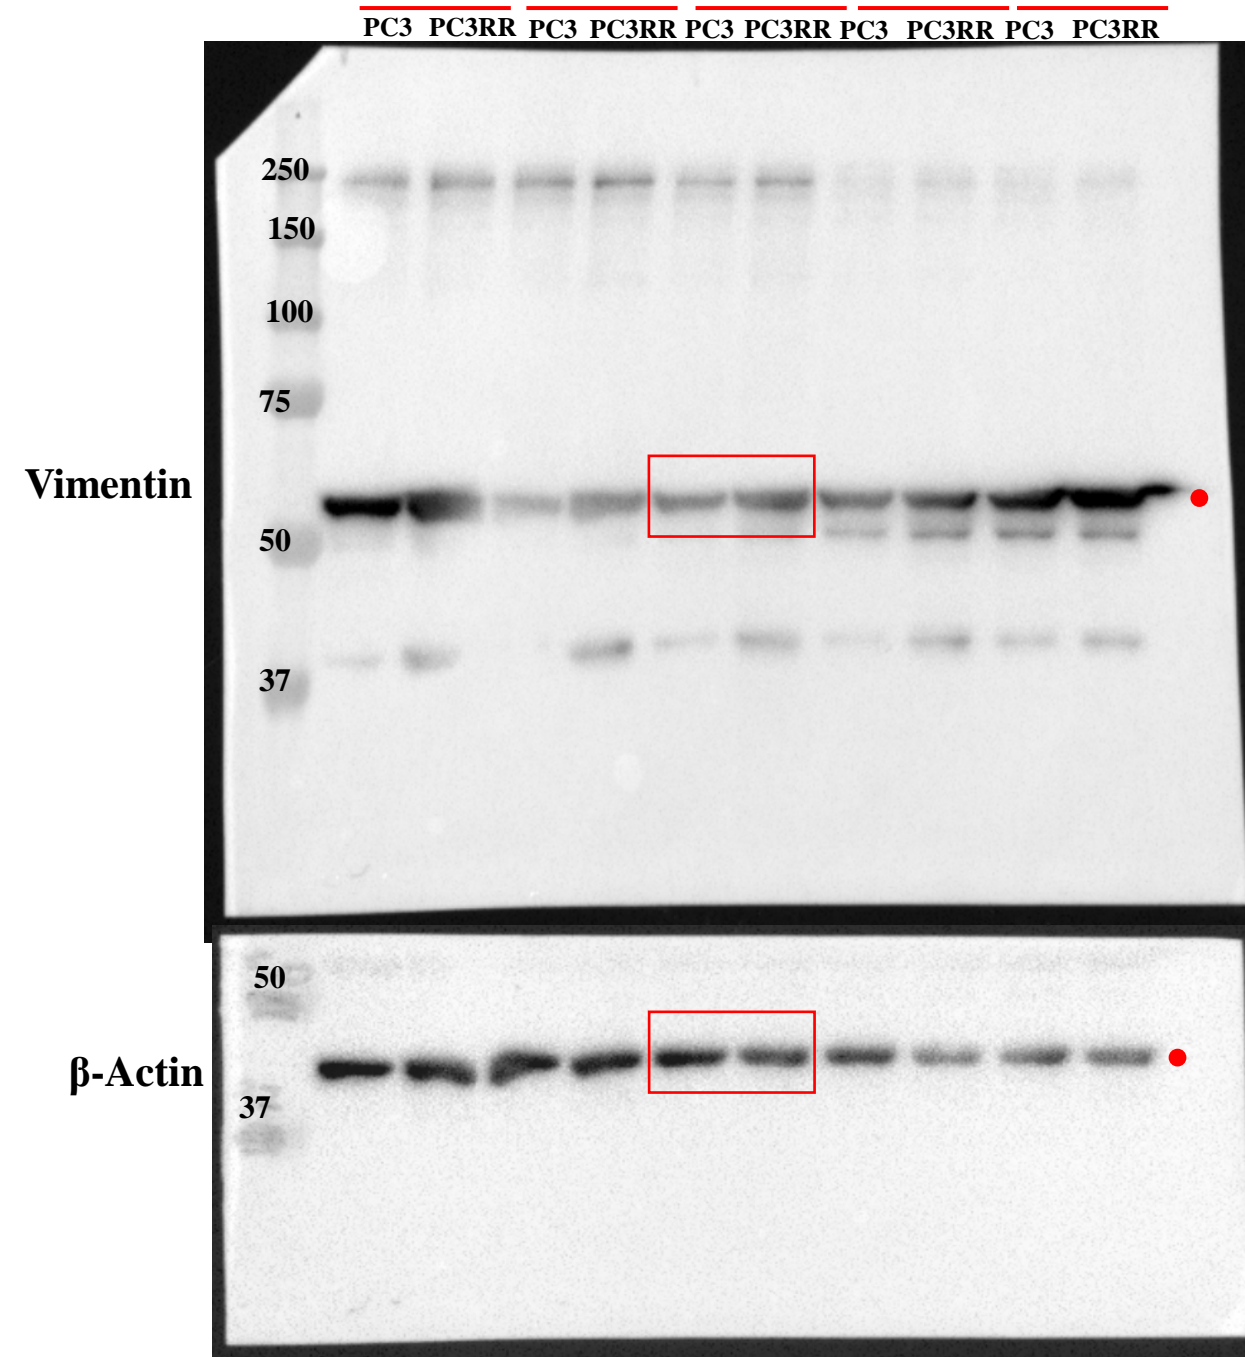

Figure. S8A

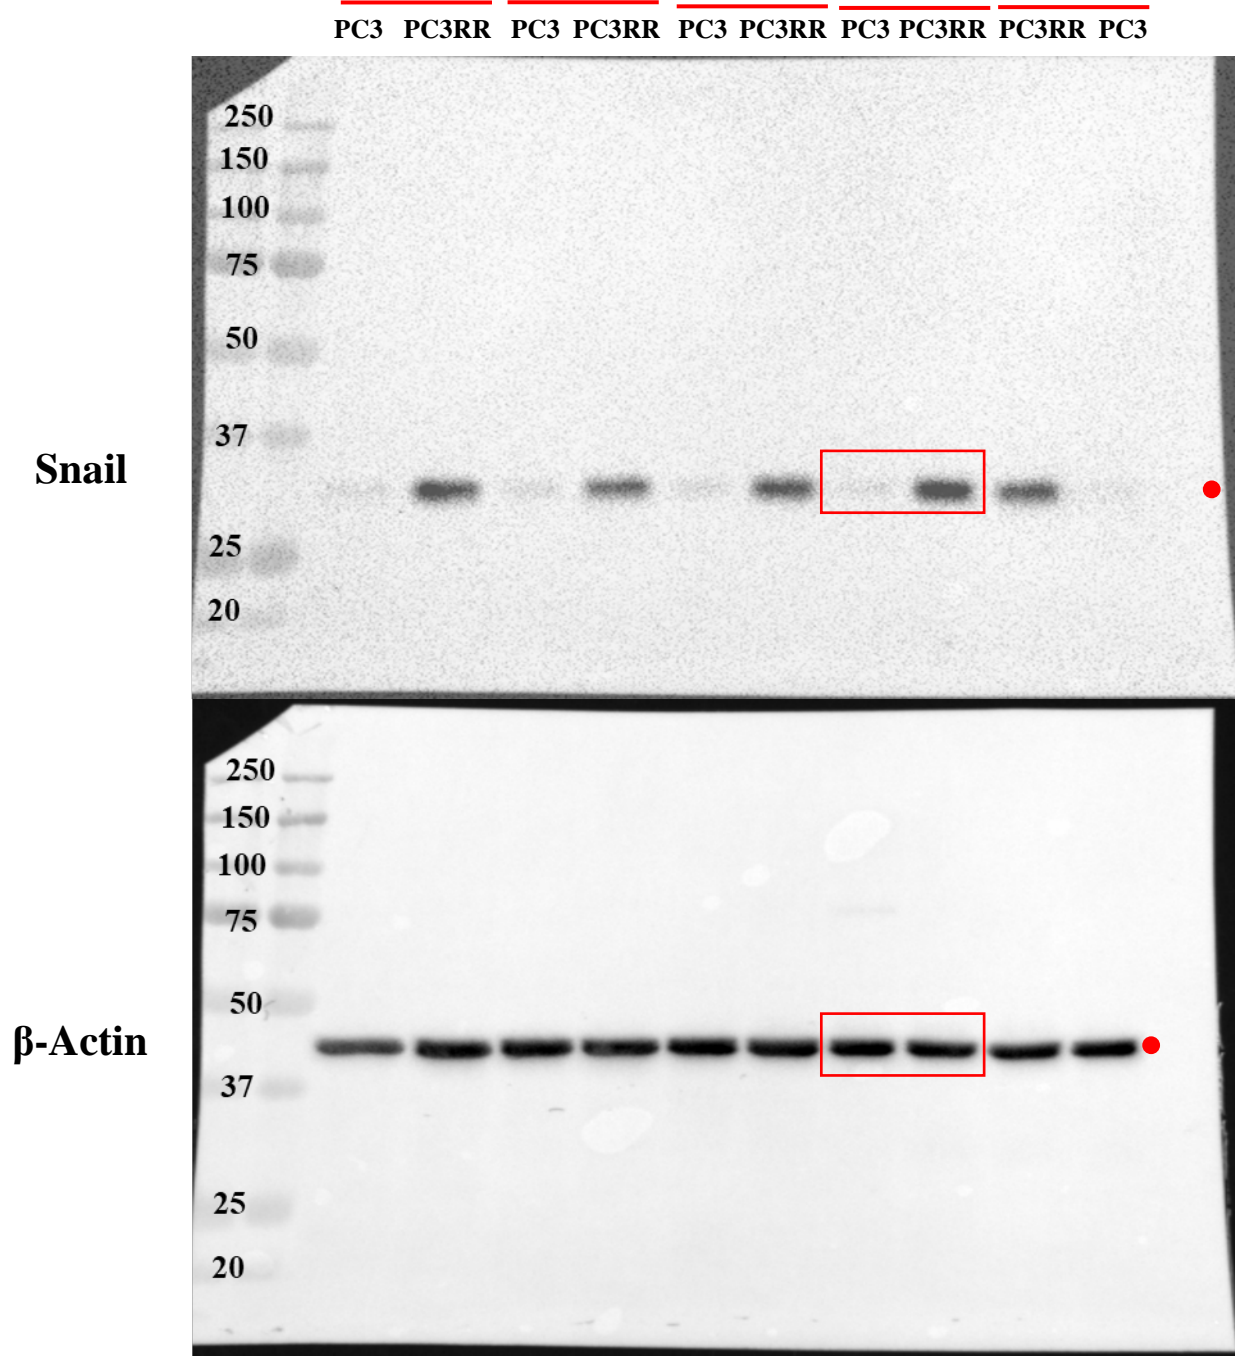

Figure. S8A



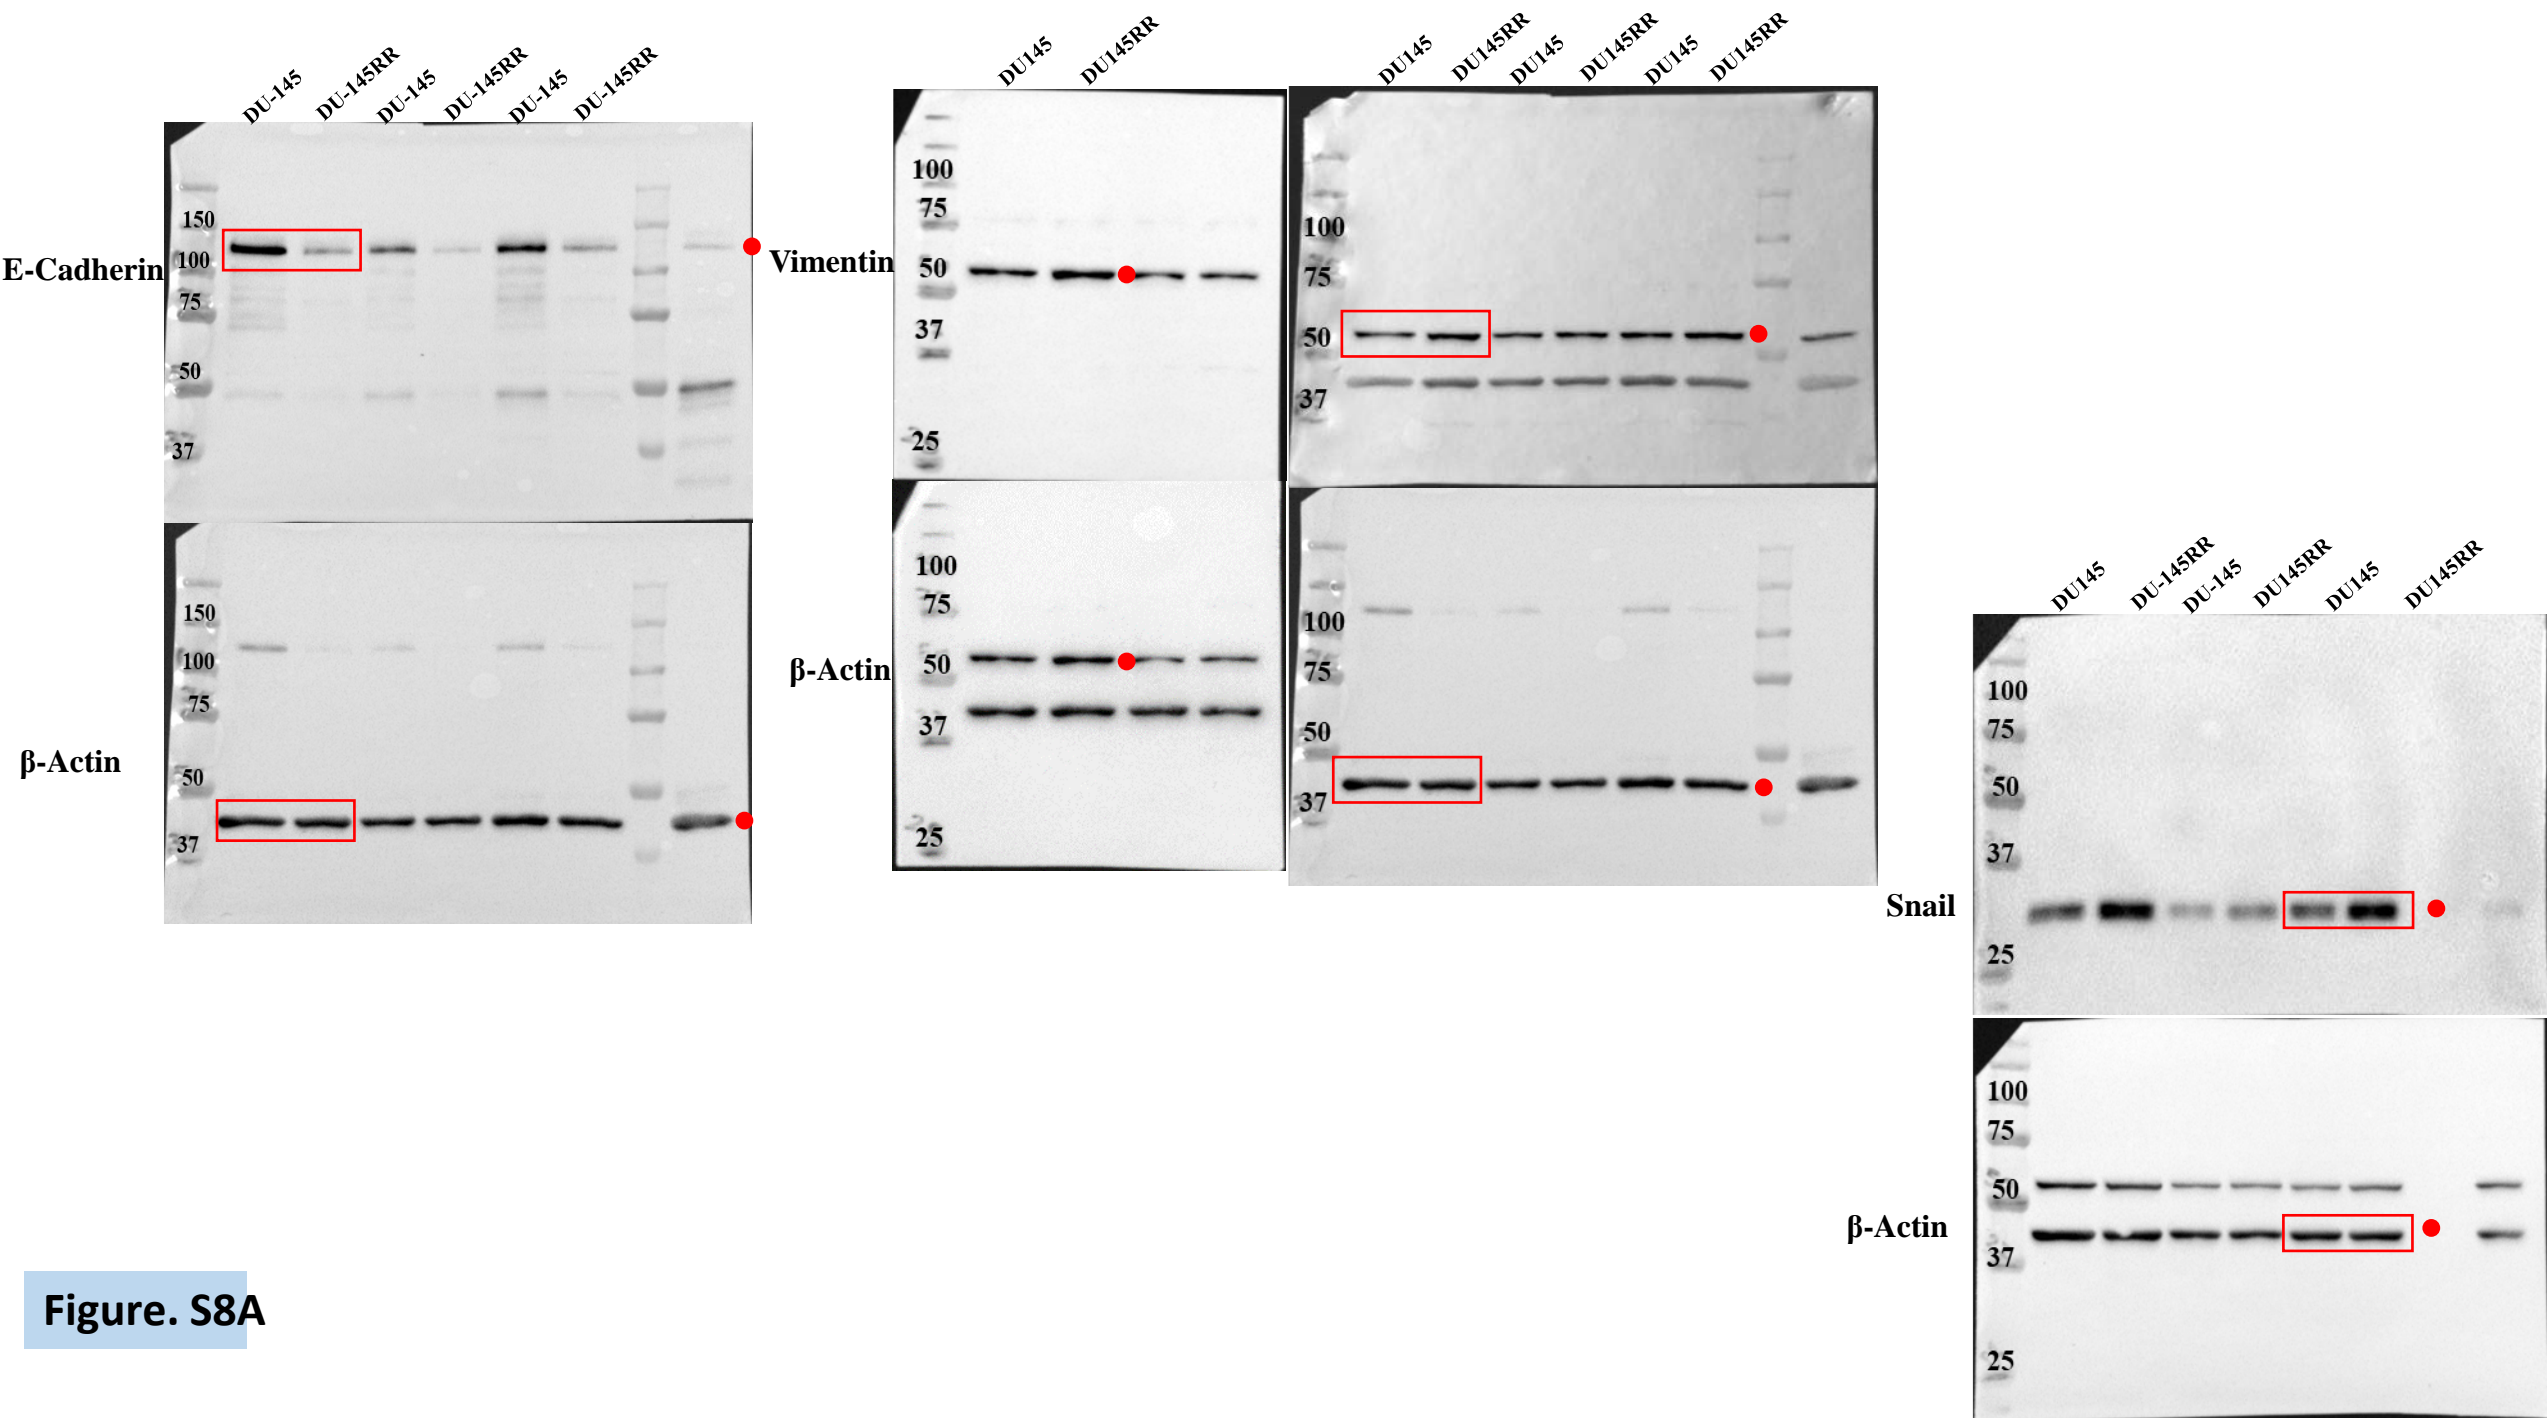

Figure. S8A

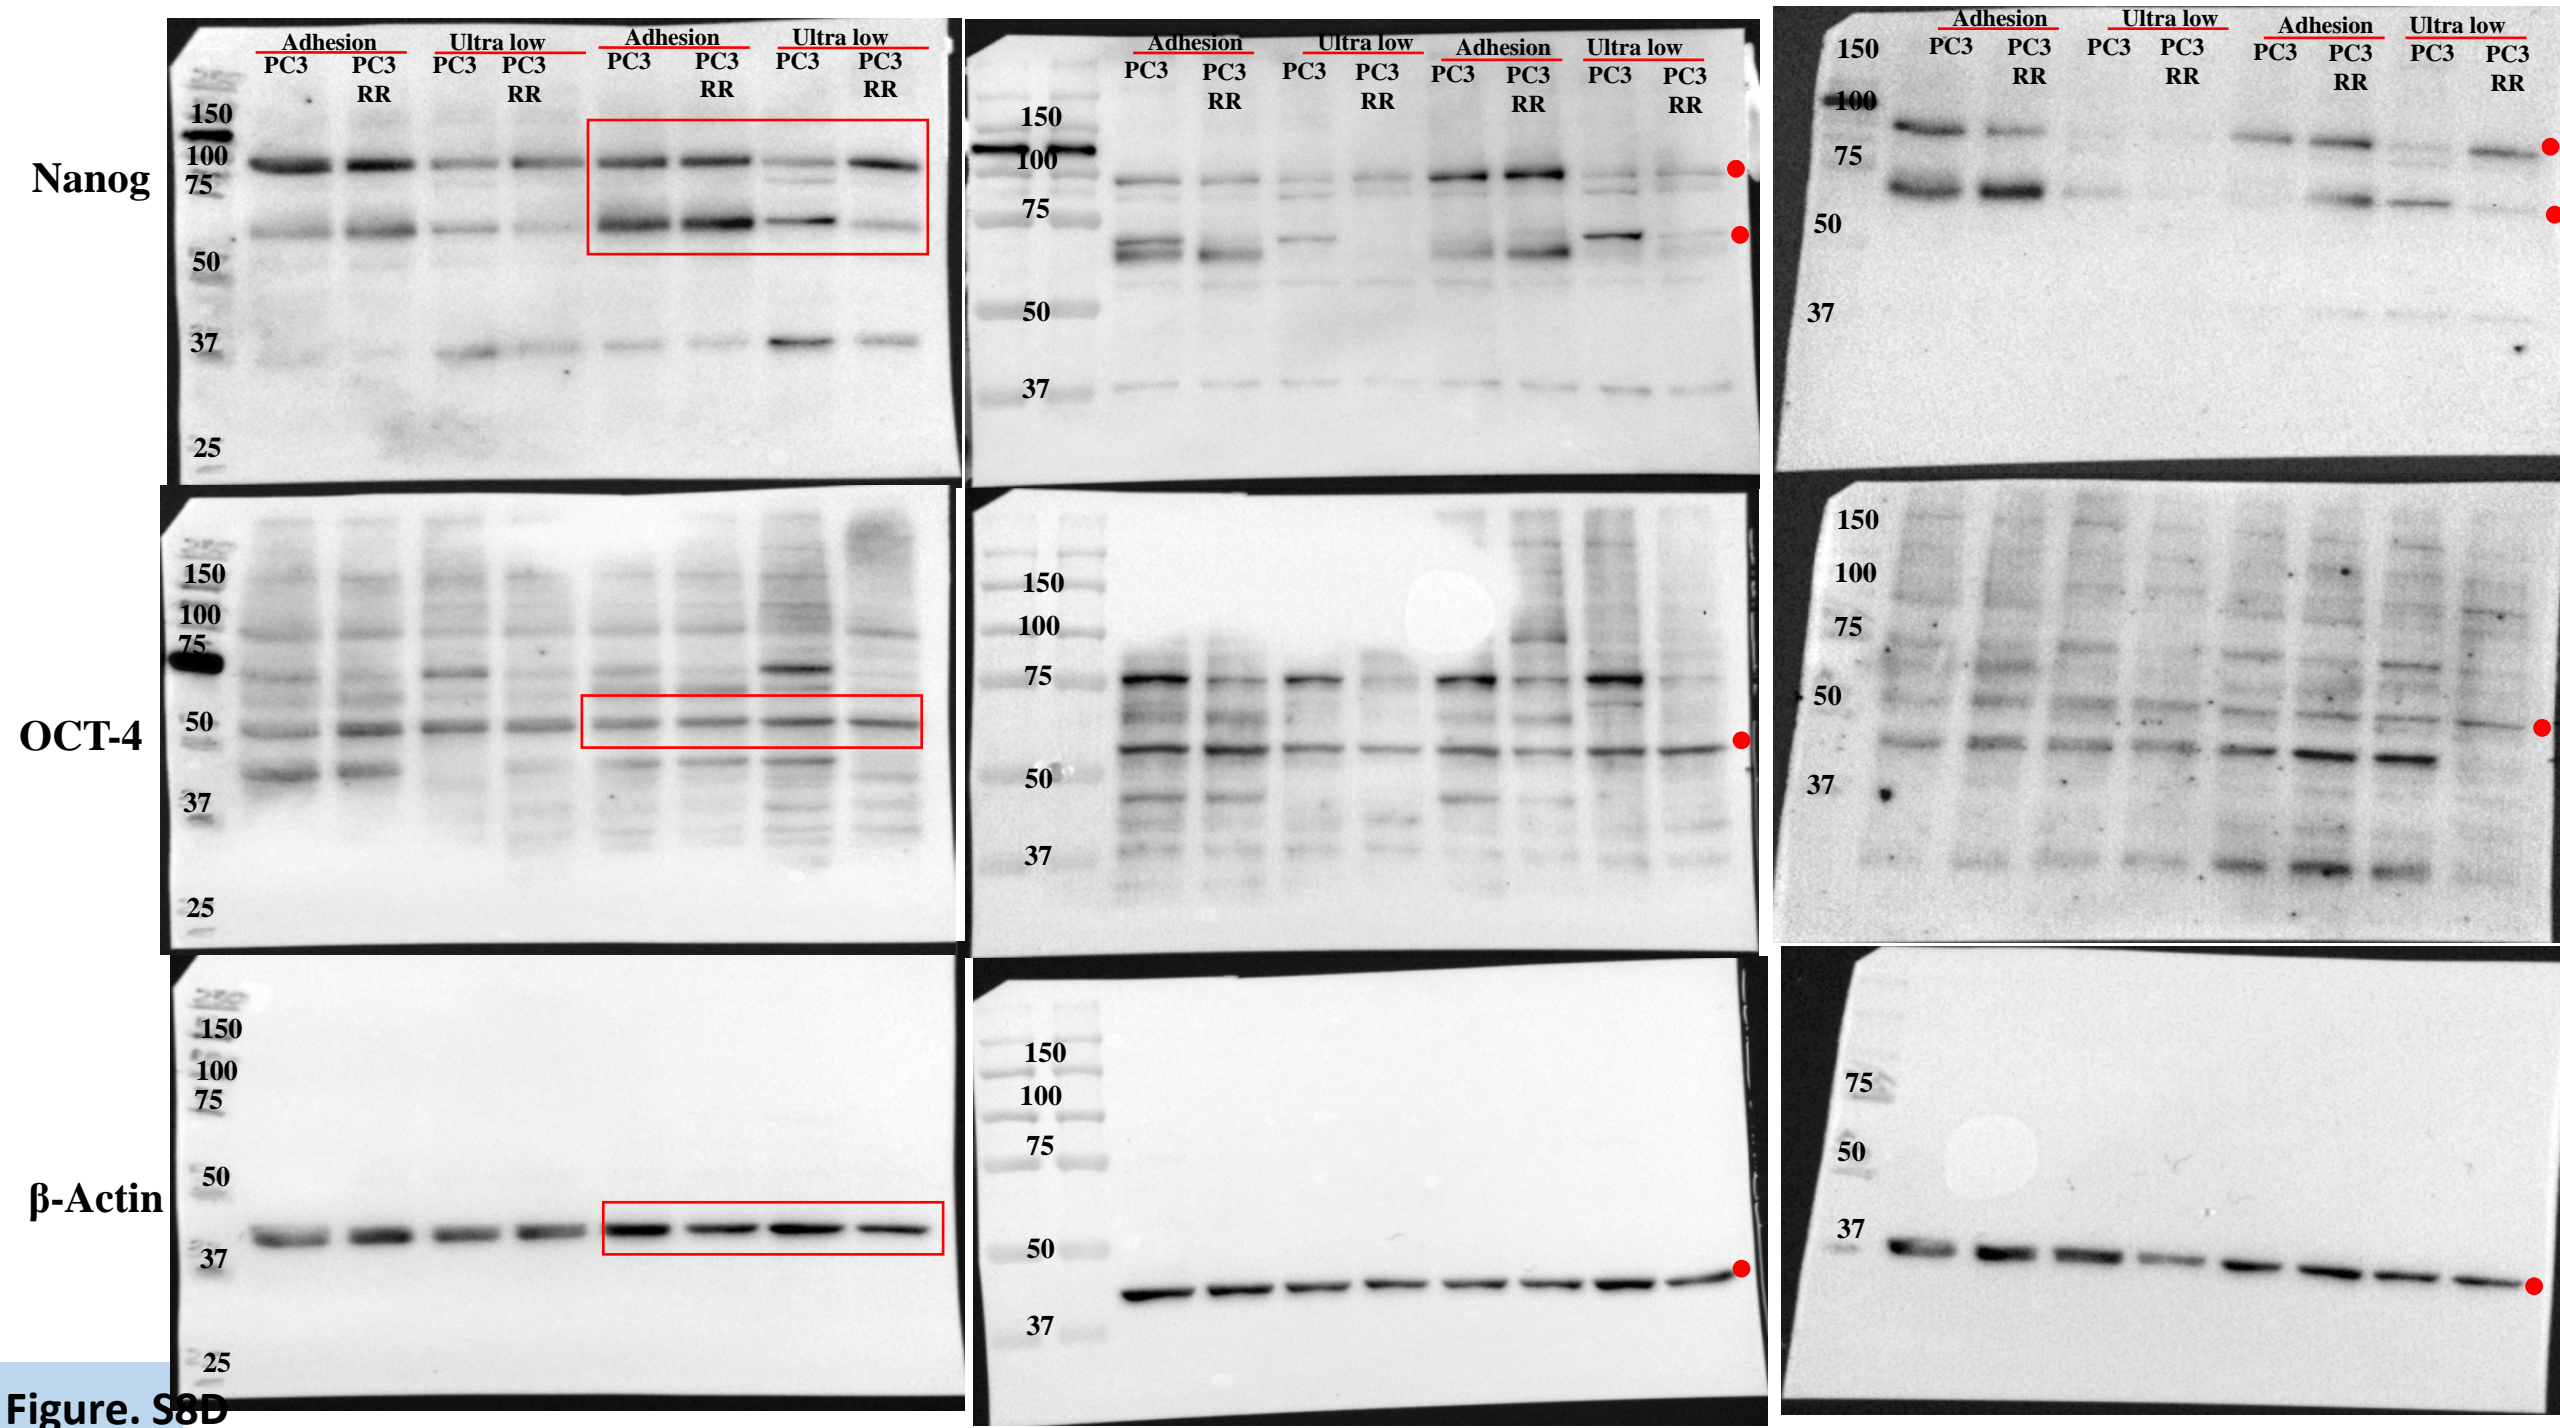



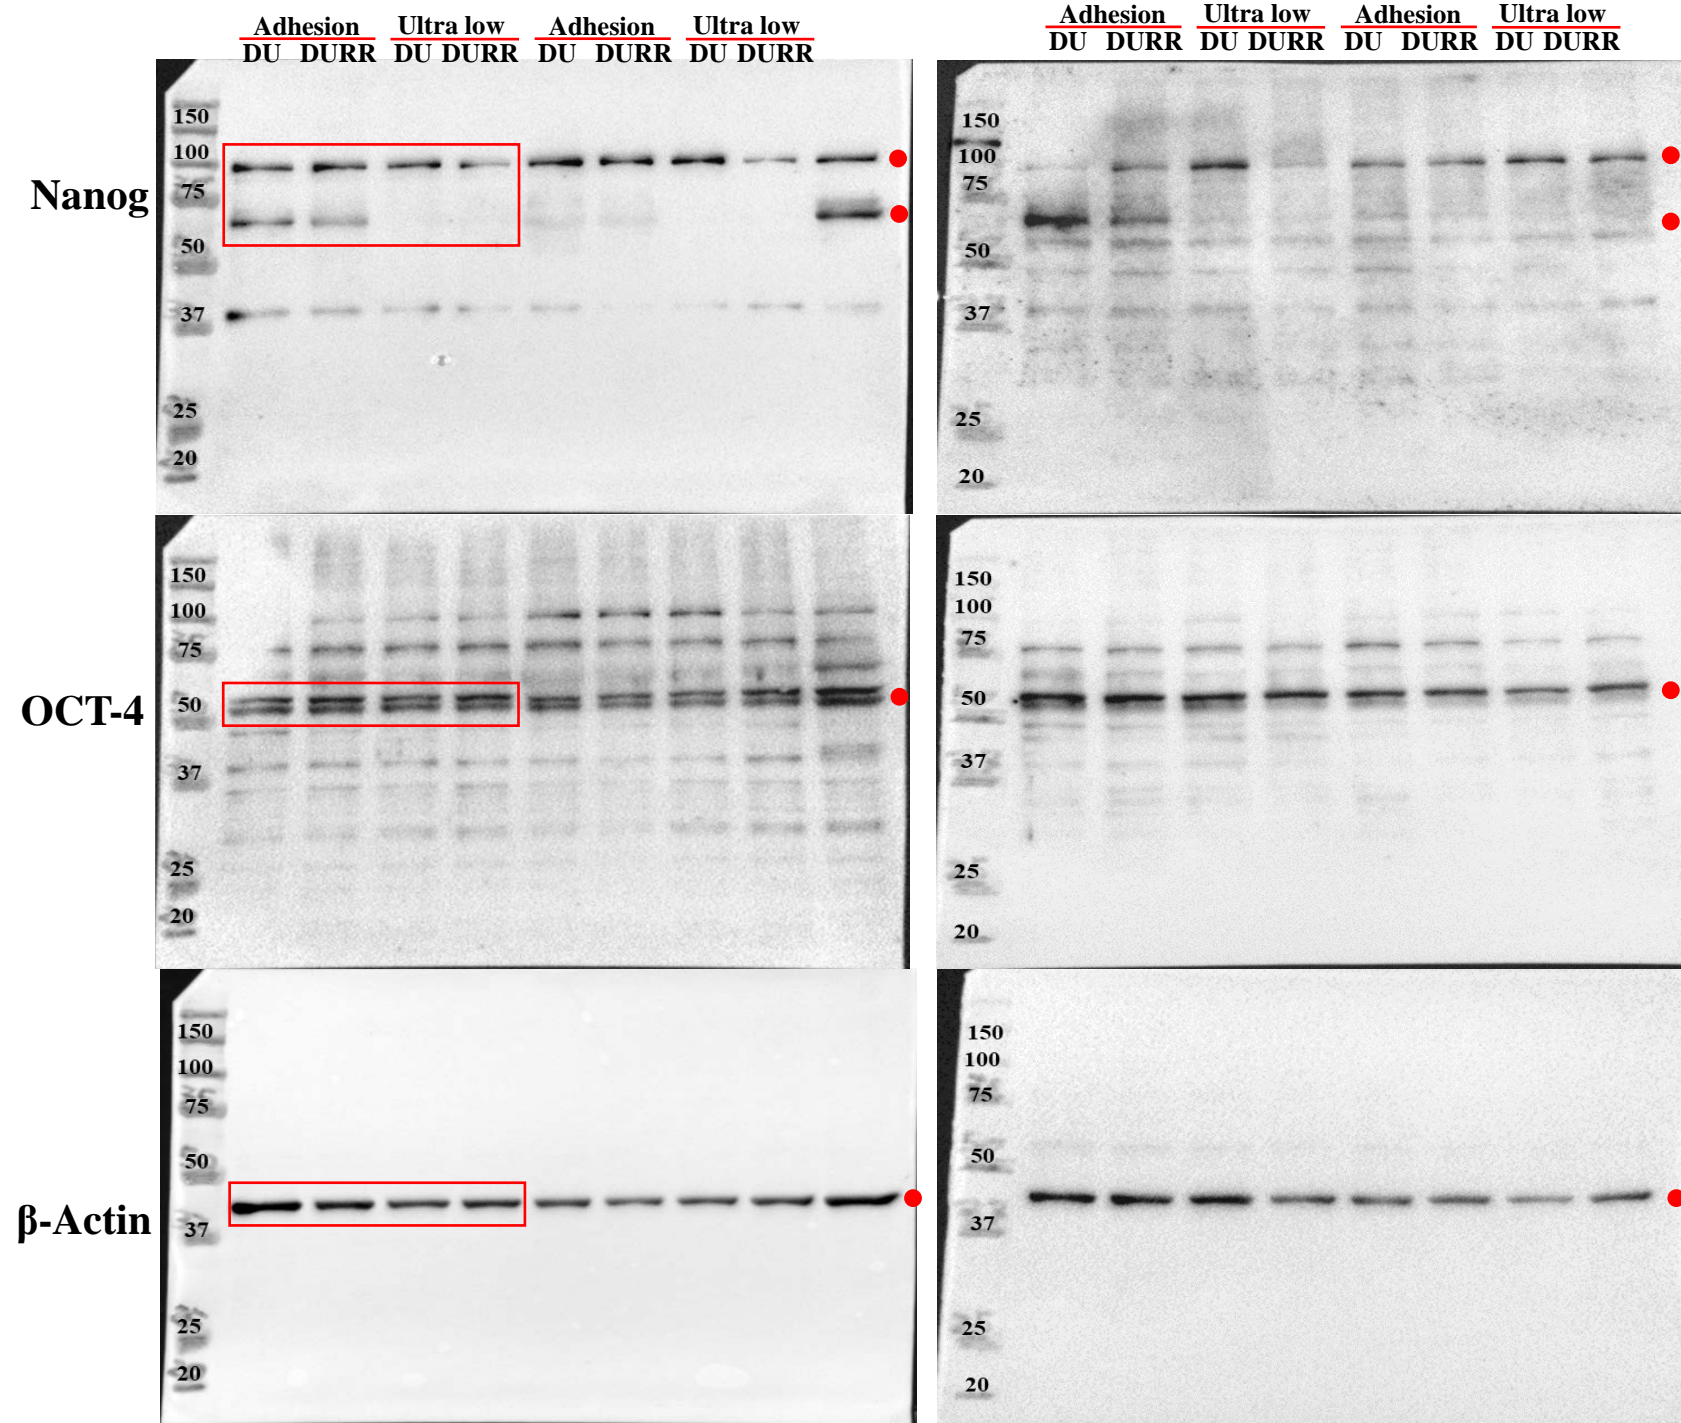

Figure. S8D

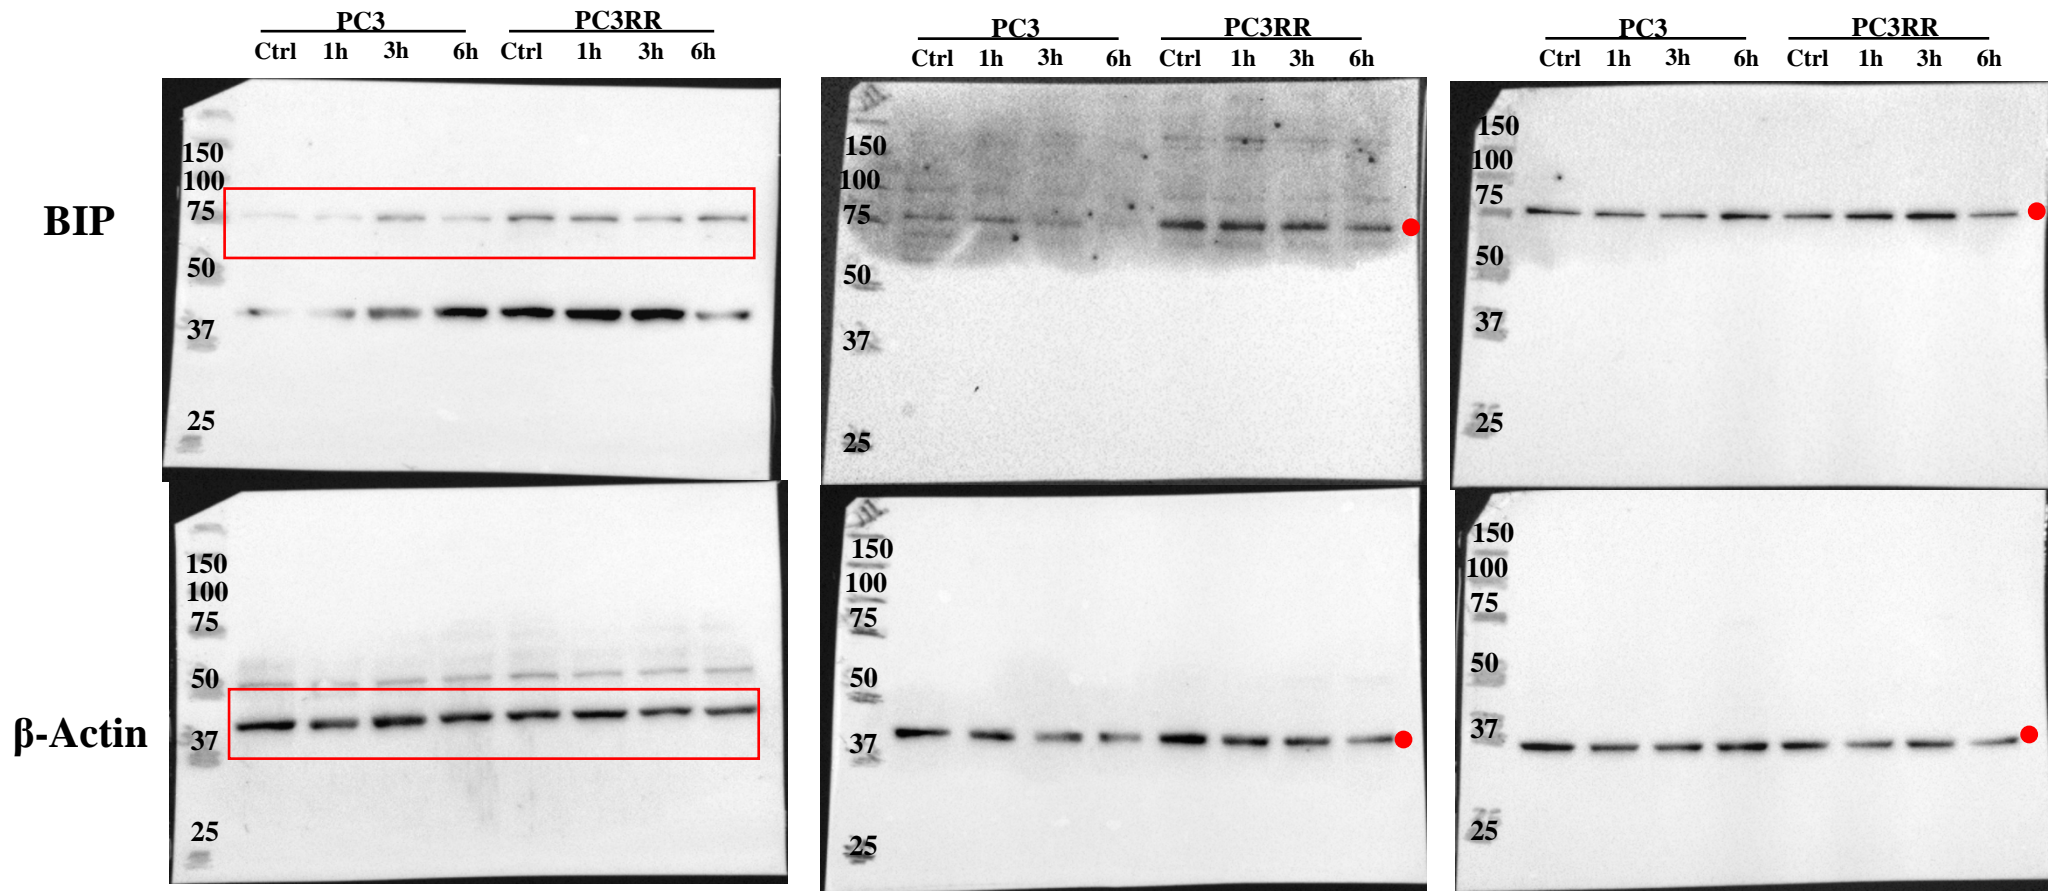

Figure. S9C



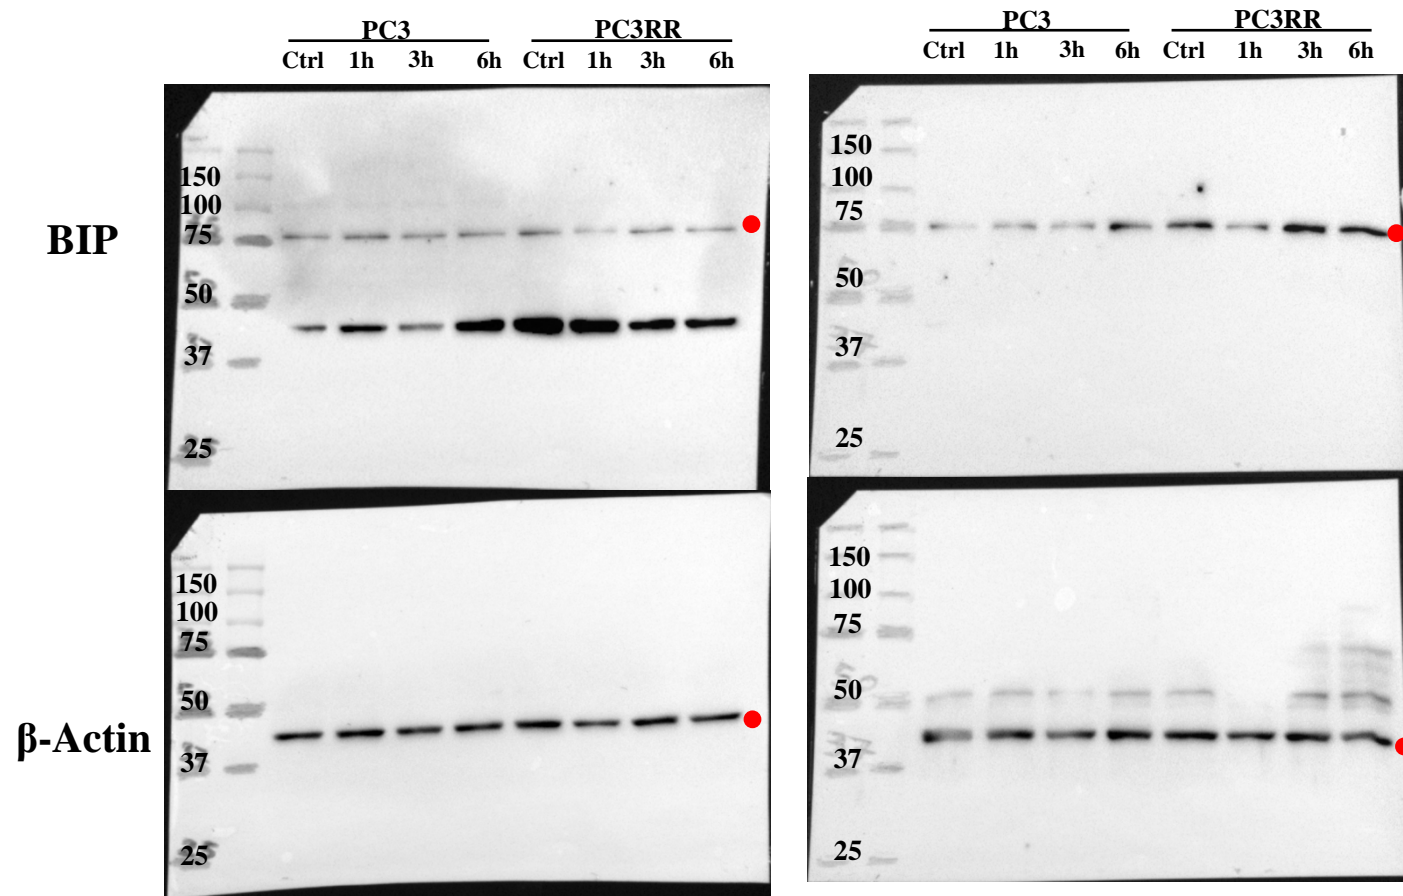

Figure. S9C bis

ATF4

$\beta$ -Actin

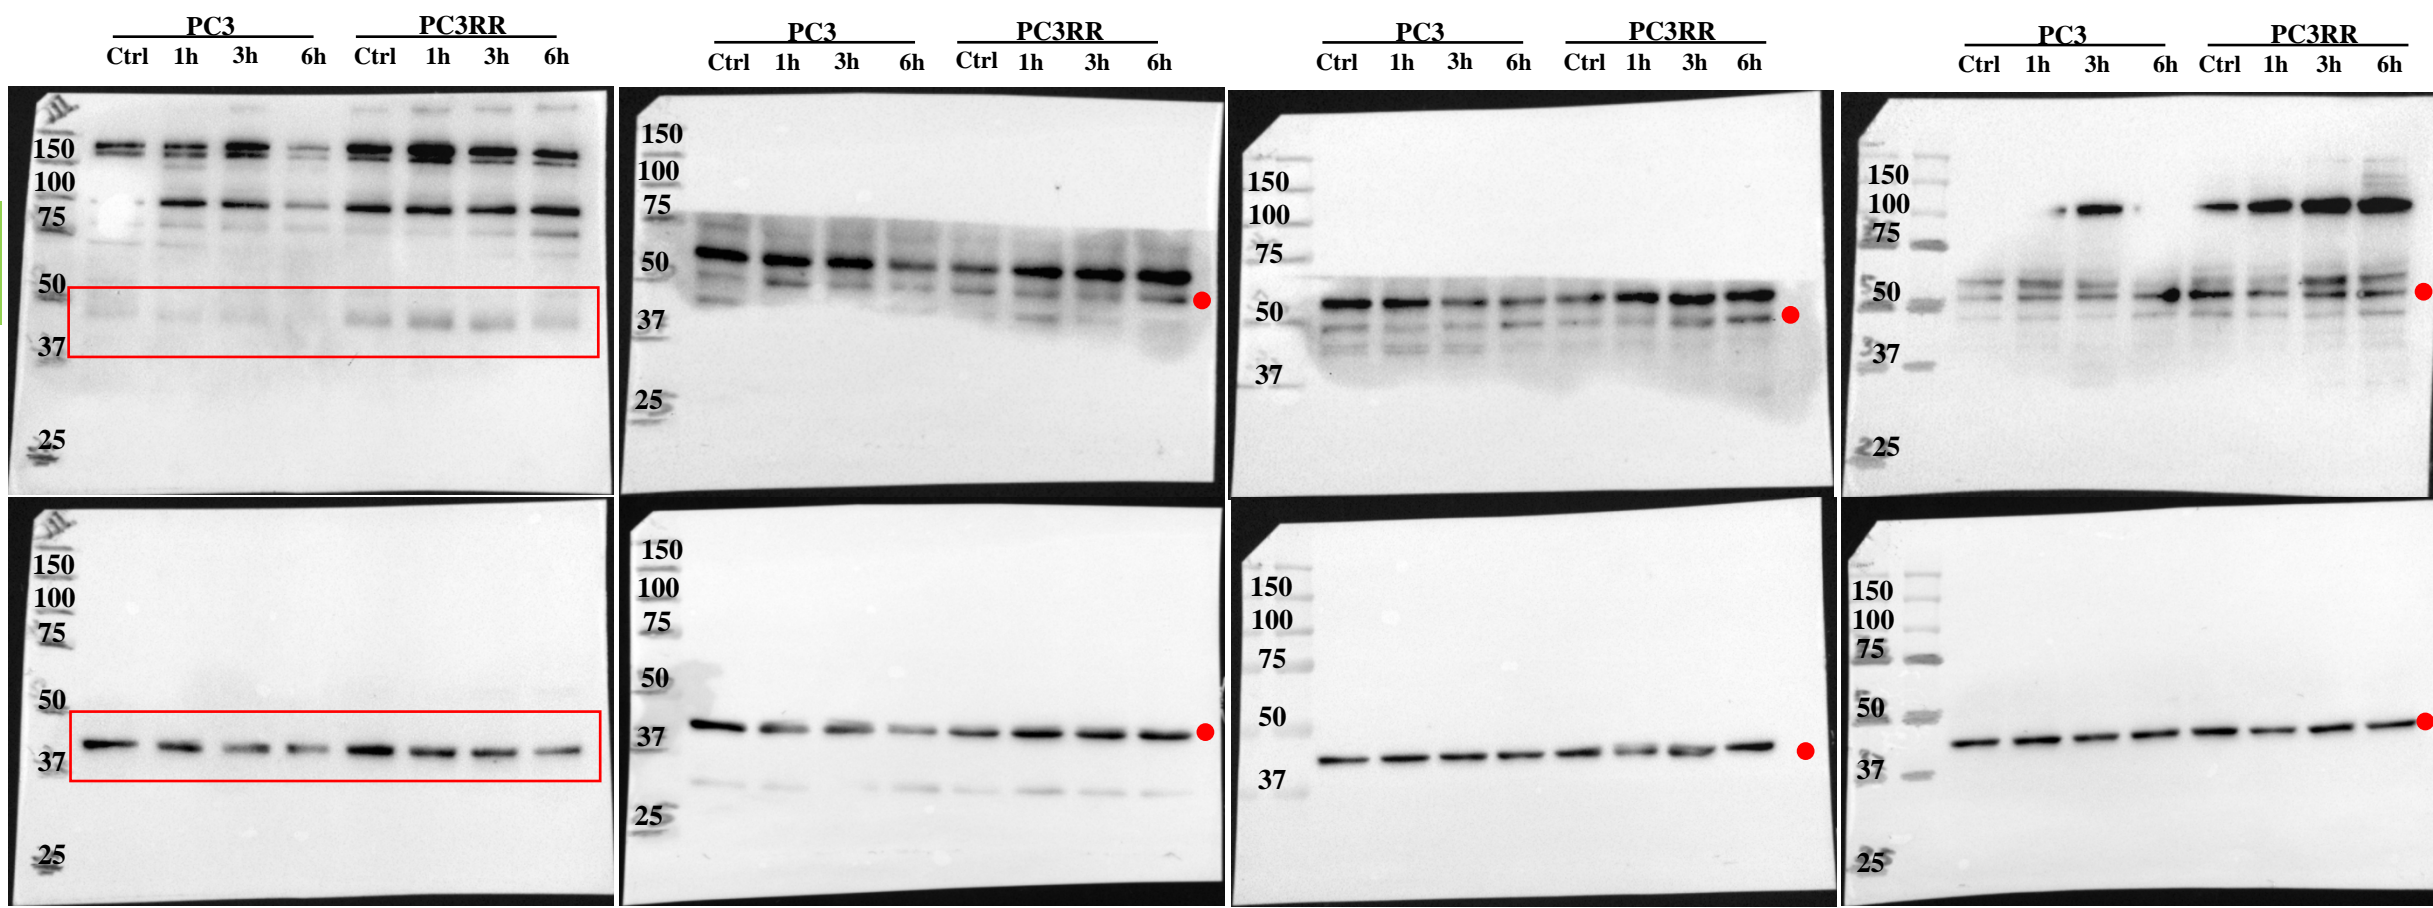

Figure. S9C



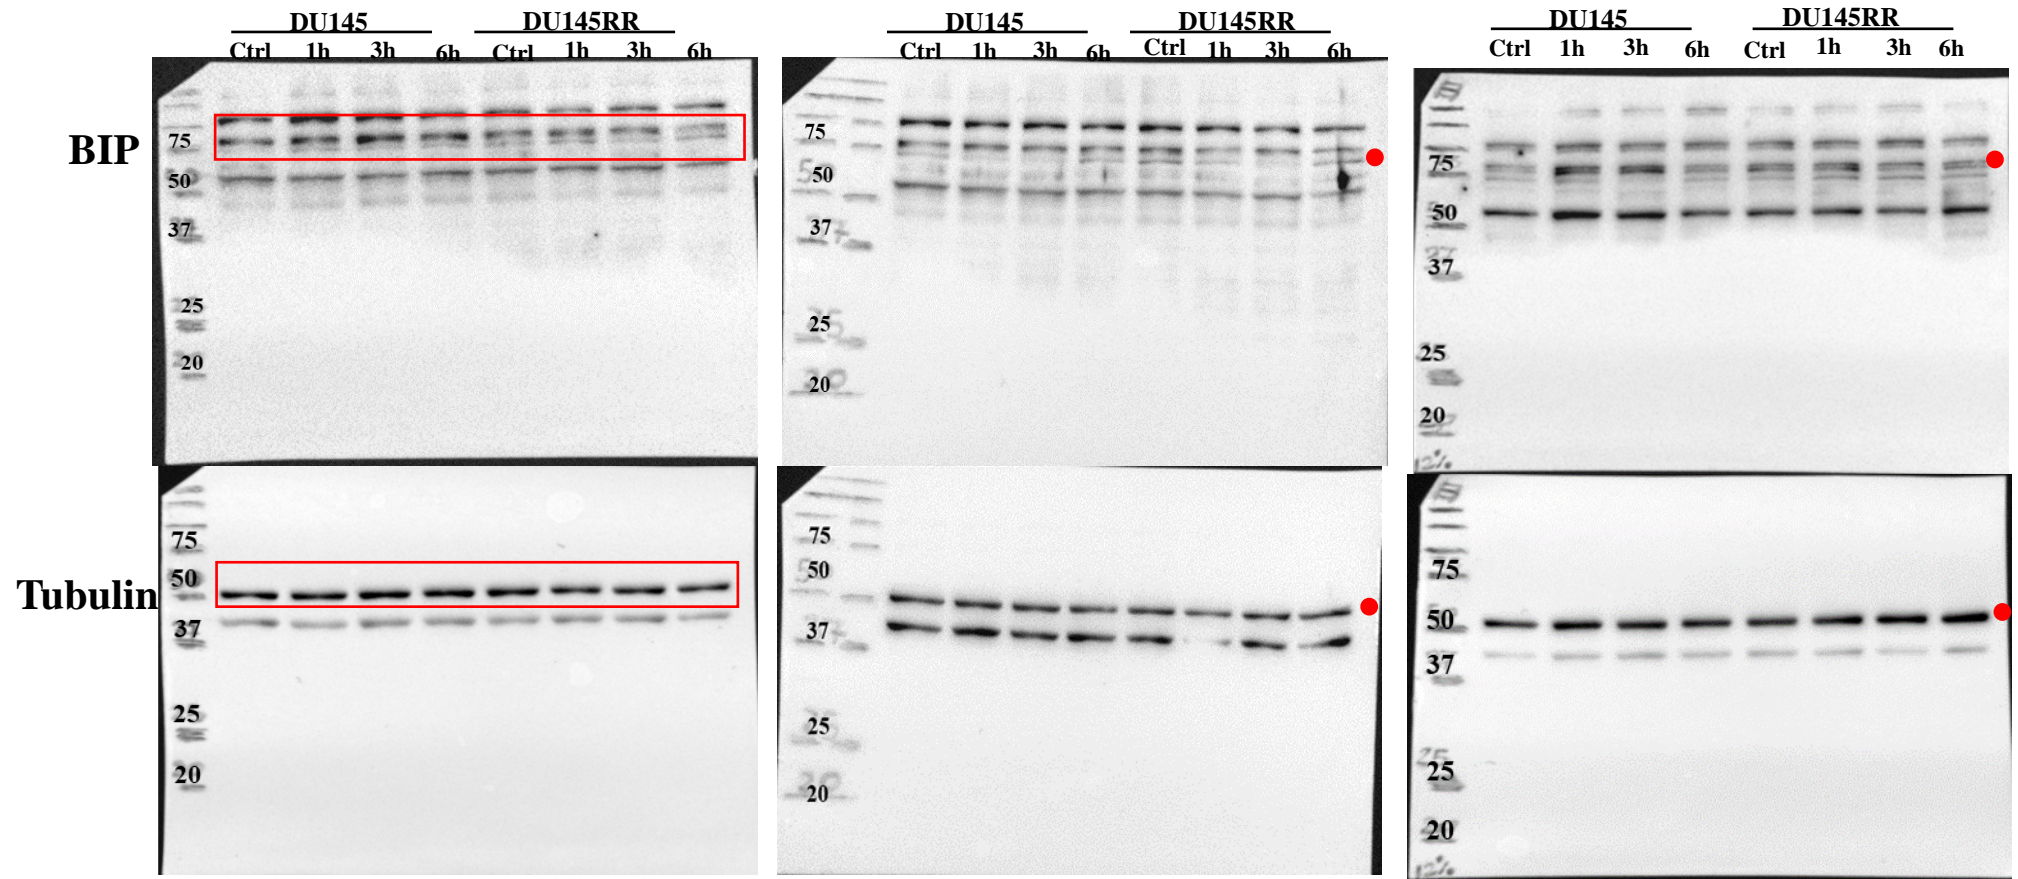

Figure. S9D

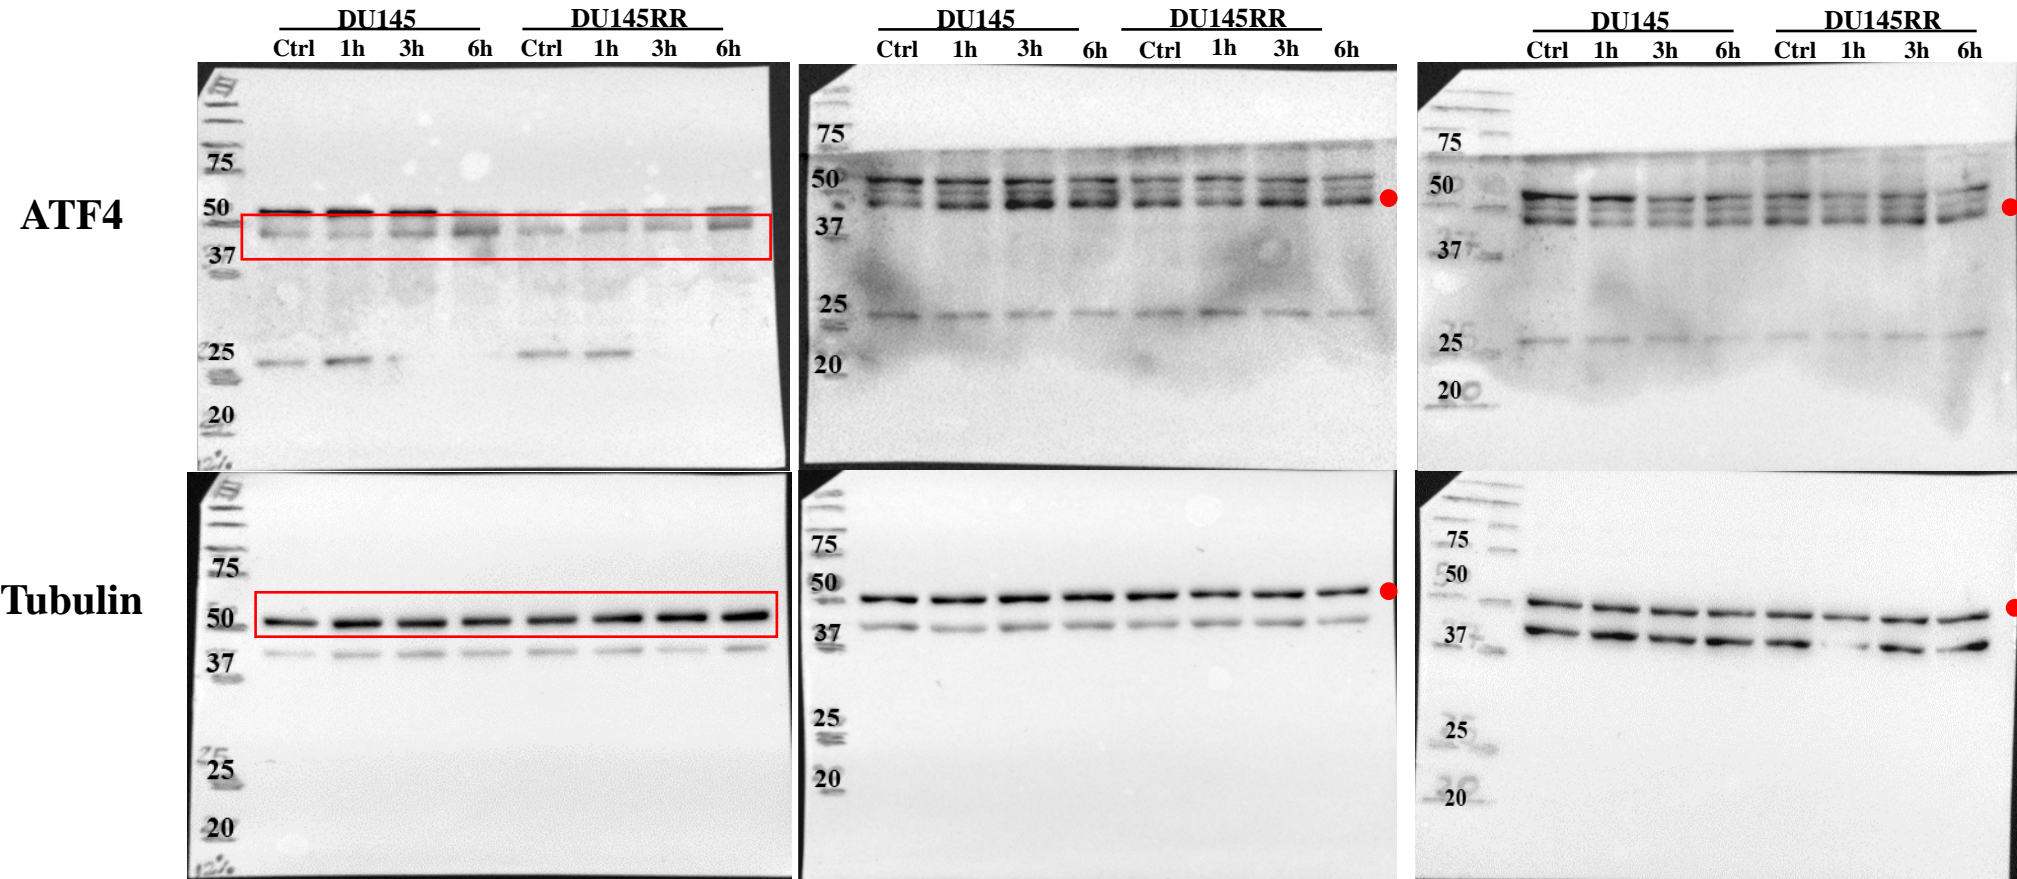

Figure. S9D



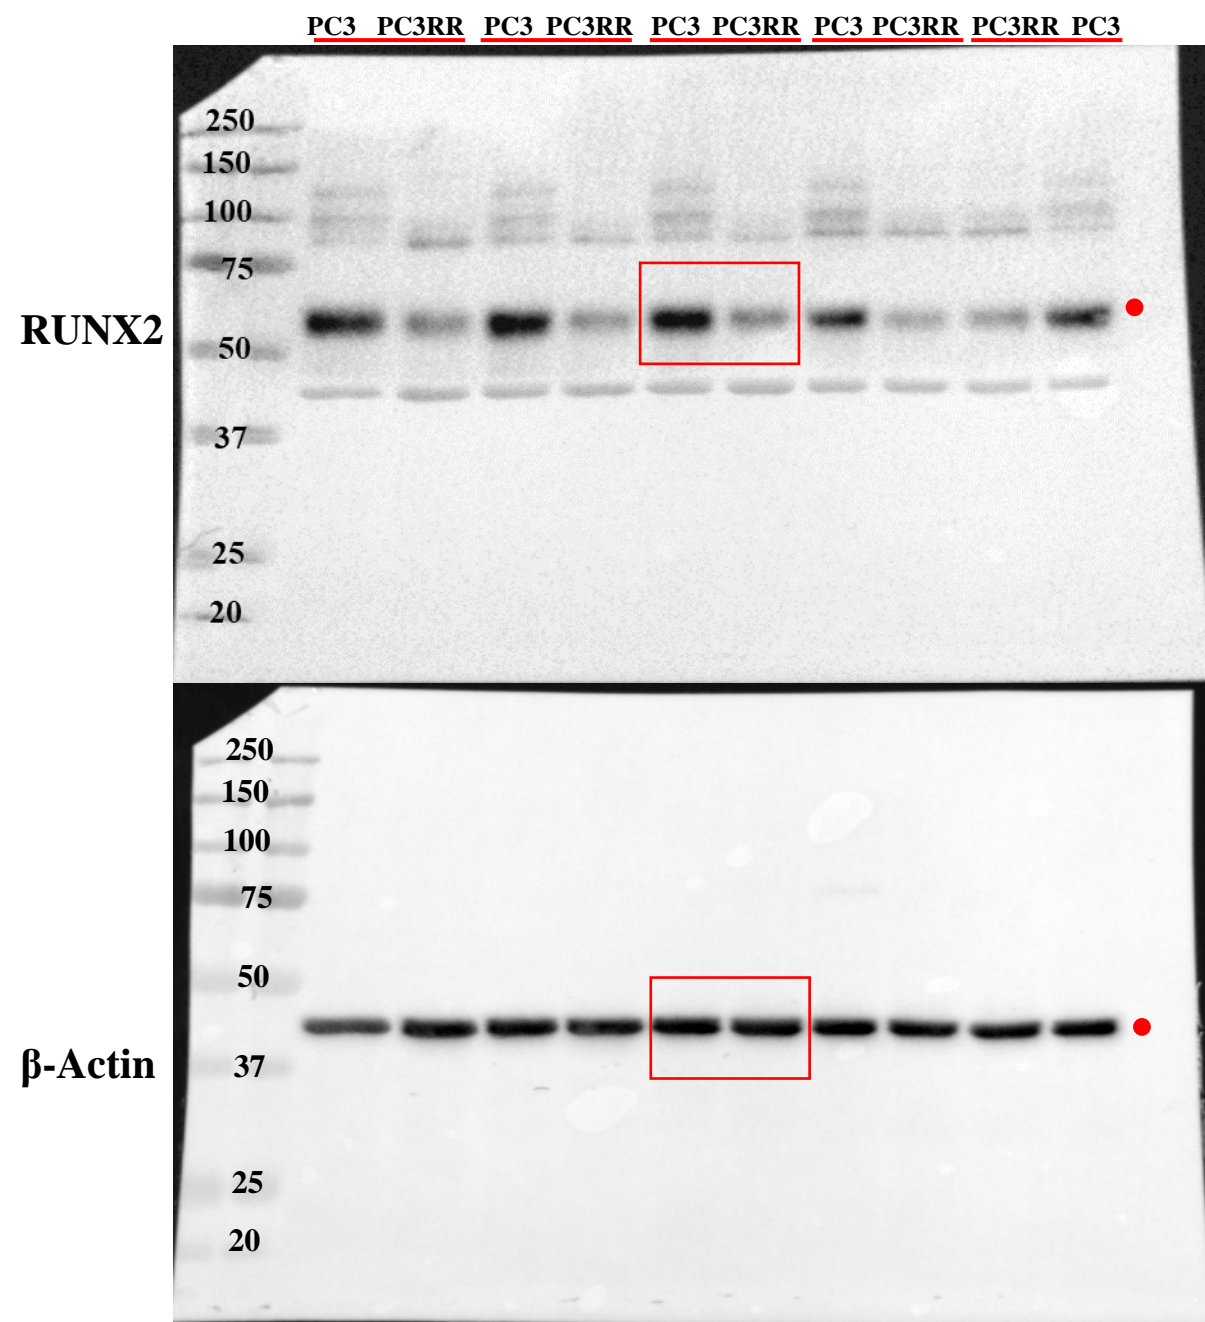

Figure. S10
